# Supplementary material
Source: PubMed Central journal article supplement (PMC6204122)
Supplement: NIHMS944714-supplement-1.pdf [file NIHMS944714-supplement-1.pdf]

## Vehicle Group Proteins

| Accession | Gene    | Fold Change (KO vs. WT) | Log2 Fold Change | Students T Test | -Log10 T Test | Description                                                                                                                            |
|-----------|---------|-------------------------|------------------|-----------------|---------------|----------------------------------------------------------------------------------------------------------------------------------------|
| P67984    | Rpl22   | 1.000954699             | 0.001376682      | 0.987029115     | 0.005670037   | 60S ribosomal protein L22 OS=Mus musculus GN=Rpl22 PE=1 SV=2                                                                           |
| P63017    | Hspa8   | 0.99894973              | -0.001516015     | 0.987249509     | 0.005573074   | Heat shock cognate 71 kDa protein OS=Mus musculus GN=Hspa8 PE=1 SV=1                                                                   |
| Q9J55     | Sv2a    | 0.998122104             | -0.002711778     | 0.987549907     | 0.005440948   | Synaptic vesicle glycoprotein 2A OS=Mus musculus GN=Sv2a PE=1 SV=1                                                                     |
| Q99QJ4    | Nampt   | 1.000959719             | 0.001383917      | 0.987697254     | 0.005376154   | Nicotinamide phosphoribosyltransferase OS=Mus musculus GN=Nampt PE=1 SV=1                                                              |
| Q9WUM4    | Coro1c  | 1.000779459             | 0.001124084      | 0.987818504     | 0.005322843   | Coronin-1C OS=Mus musculus GN=Coro1c PE=1 SV=2                                                                                         |
| Q9WUR9    | Ak4     | 0.997178402             | -0.004076459     | 0.987845501     | 0.005310974   | Adenylate kinase 4, mitochondrial OS=Mus musculus GN=Ak4 PE=1 SV=1                                                                     |
| P13595-4  | Ncam1   | 0.999345232             | -0.00094494      | 0.988023974     | 0.005232517   | Isoform 4 of Neural cell adhesion molecule 1 OS=Mus musculus GN=Ncam1                                                                  |
| P11531    | Dmd     | 1.003197761             | 0.004606033      | 0.988286346     | 0.005117205   | Dystrophin OS=Mus musculus GN=Dmd PE=1 SV=3                                                                                            |
| Q6PF7-3   | Tmeff1  | 0.996878441             | -0.004510501     | 0.988408199     | 0.005063661   | Isoform 3 of Tomoregulin-1 OS=Mus musculus GN=Tmeff1                                                                                   |
| P47757-4  | Capzb   | 0.998736408             | -0.001824131     | 0.988494203     | 0.005025873   | Isoform 3 of F-actin-capping protein subunit beta OS=Mus musculus GN=Capzb                                                             |
| P24668    | M6pr    | 1.001149225             | 0.001657029      | 0.988560197     | 0.00499688    | Cation-dependent mannose-6-phosphate receptor OS=Mus musculus GN=M6pr PE=1 SV=1                                                        |
| OS4950    | Prkag1  | 1.001265549             | 0.001824647      | 0.988886157     | 0.004853703   | 5'-AMP-activated protein kinase subunit gamma-1 OS=Mus musculus GN=Prkag1 PE=1 SV=2                                                    |
| P83882    | Rpl36a  | 1.001898162             | 0.002735821      | 0.989008587     | 0.004799938   | 60S ribosomal protein L36a OS=Mus musculus GN=Rpl36a PE=1 SV=2                                                                         |
| Q8CDG3-2  | Vcpi1   | 1.001034994             | 0.001492409      | 0.989043891     | 0.004784435   | Isoform 2 of Deubiquitinating protein VCI135 OS=Mus musculus GN=Vcpi1                                                                  |
| P63080    | Gabrb3  | 1.001894021             | 0.00272991       | 0.98941445      | 0.004621751   | Gamma-aminobutyric acid receptor subunit beta-3 OS=Mus musculus GN=Gabrb3 PE=2 SV=1                                                    |
| Q8R050    | Gsp1    | 0.999603491             | -0.000572155     | 0.990460679     | 0.004186702   | Eukaryotic peptide chain release factor GTP-binding subunit ERF3A OS=Mus musculus GN=Gsp1 PE=1 SV=2                                    |
| Q32K22-4  | Vezt    | 1.003933465             | 0.005663659      | 0.990482518     | 0.004153185   | Isoform 4 of Vezatin OS=Mus musculus GN=Vezt                                                                                           |
| Q6PAJ1    | Bcr     | 0.997461267             | -0.003667275     | 0.990499223     | 0.004145861   | Breakpoint cluster region protein OS=Mus musculus GN=Bcr PE=1 SV=3                                                                     |
| Q9DAU1    | Cnpy3   | 0.998928547             | -0.001546609     | 0.990720783     | 0.004048726   | Protein canopy homolog 3 OS=Mus musculus GN=Cnpy3 PE=1 SV=1                                                                            |
| Q3UTH8-3  | Arhgef9 | 1.001626204             | 0.002344211      | 0.991054003     | 0.00390268    | Isoform 3 of Rho guanine nucleotide exchange factor 9 OS=Mus musculus GN=Arhgef9                                                       |
| Q9JH7     | Id4     | 1.001162449             | 0.001676085      | 0.991064759     | 0.003897966   | Insulin-degrading enzyme OS=Mus musculus GN=Id4 PE=1 SV=1                                                                              |
| Q9JH76    | Arpc3   | 1.000634455             | 0.000915034      | 0.991439471     | 0.003733795   | Actin-related protein 2/3 complex subunit 3 OS=Mus musculus GN=Arpc3 PE=1 SV=3                                                         |
| P27546-3  | Map4    | 0.999626897             | -0.000538375     | 0.991523347     | 0.003697055   | Isoform 3 of Microtubule-associated protein 4 OS=Mus musculus GN=Map4                                                                  |
| Q6PCP5    | Mff     | 0.99817811              | -0.002630829     | 0.991624301     | 0.003652839   | Mitochondrial fission factor OS=Mus musculus GN=Mff PE=1 SV=1                                                                          |
| Q9CQ46    | Chchd1  | 1.001691878             | 0.002438801      | 0.991775283     | 0.00358672    | Coiled-coil-helix-coiled-coil-helix domain-containing protein 1 OS=Mus musculus GN=Chchd1 PE=3 SV=1                                    |
| P48453    | Ppp3cb  | 1.000945419             | 0.001363307      | 0.991788097     | 0.003581108   | Serine/threonine-protein phosphatase 2B catalytic subunit beta isoform OS=Mus musculus GN=Ppp3cb PE=1 SV=2                             |
| P54763    | Ephb2   | 1.000994899             | 0.001434609      | 0.992177375     | 0.003410681   | Ephrin type-B receptor 2 OS=Mus musculus GN=Ephb2 PE=1 SV=2                                                                            |
| Q5EBI4    | Ernm    | 0.997309443             | -0.003886885     | 0.992400109     | 0.003313197   | Ermin OS=Mus musculus GN=Ernm PE=1 SV=1                                                                                                |
| Q49C28    | Rpl15   | 1.000424928             | 0.000216108      | 0.992624923     | 0.003214825   | 60S ribosomal protein L15 OS=Mus musculus GN=Rpl15 PE=2 SV=4                                                                           |
| Q68FL6    | Mars    | 0.999248402             | -0.001084735     | 0.992807694     | 0.003134866   | Methionine--tRNA ligase, cytoplasmic OS=Mus musculus GN=Mars PE=2 SV=1                                                                 |
| P29758    | Oat     | 1.001223132             | 0.001763528      | 0.992906238     | 0.003091761   | Ornithine aminotransferase, mitochondrial OS=Mus musculus GN=Oat PE=1 SV=1                                                             |
| Q9CRA5    | Golph3  | 1.000425545             | 0.000613803      | 0.9925950852    | 0.003072247   | Golgi phosphoprotein 3 OS=Mus musculus GN=Golph3 PE=1 SV=1                                                                             |
| P56380    | Nudt2   | 1.000547079             | 0.000789053      | 0.992896717     | 0.002896717   | Bis[5'-nucleosyl]-tetraphosphatase [asymmetrical] OS=Mus musculus GN=Nudt2 PE=1 SV=3                                                   |
| Q8BFQ8    | Pddc1   | 0.999684056             | -0.000455883     | 0.993428187     | 0.002863522   | Parkinson disease 7 domain-containing protein 1 OS=Mus musculus GN=Pddc1 PE=1 SV=1                                                     |
| Q5XG69    | Fam169a | 0.998503171             | 0.000531088      | 0.993520934     | 0.002822977   | Soluble lamin-associated protein of 75 kDa OS=Mus musculus GN=Fam169a PE=1 SV=3                                                        |
| Q9C251    | Aldh1b1 | 0.99978182              | -0.000314802     | 0.99425898      | 0.002500478   | Aldehyde dehydrogenase X, mitochondrial OS=Mus musculus GN=Aldh1b1 PE=1 SV=1                                                           |
| Q8R3H9    | Ttc4    | 1.000621046             | 0.000895703      | 0.994282446     | 0.002490228   | Tetratricopeptide repeat protein 4 OS=Mus musculus GN=Ttc4 PE=2 SV=1                                                                   |
| Q6P5E4    | Uggt1   | 0.999755694             | -0.000352503     | 0.994354202     | 0.002458887   | UDP-glucose:glycoprotein glucosyltransferase 1 OS=Mus musculus GN=Uggt1 PE=1 SV=4                                                      |
| P62830    | Rpl23   | 1.000452933             | 0.000653296      | 0.994473987     | 0.002406572   | 60S ribosomal protein L23 OS=Mus musculus GN=Rpl23 PE=1 SV=1                                                                           |
| AZAN08-2  | Ubr4    | 1.000530856             | 0.000765659      | 0.99451511      | 0.002388614   | Isoform 2 of E3 ubiquitin-protein ligase UBR4 OS=Mus musculus GN=Ubr4                                                                  |
| Q8OT53-4  | Lphn3   | 0.999544962             | -0.00065663      | 0.994537983     | 0.002378626   | Isoform 4 of Latrophilin-3 OS=Mus musculus GN=Lphn3                                                                                    |
| Q9ES28-2  | Gtf2i   | 1.000940616             | 0.001356384      | 0.995024591     | 0.002166186   | Isoform 2 of General transcription factor II-I OS=Mus musculus GN=Gtf2i                                                                |
| Q9JRK6    | HYOU1   | 0.999674772             | -0.000469281     | 0.995139559     | 0.002116009   | Hypoxia up-regulated protein 1 OS=Mus musculus GN=Hyou1 PE=1 SV=1                                                                      |
| Q9DC51    | Gnai3   | 0.999507438             | -0.000710792     | 0.995170225     | 0.002102626   | Guanine nucleotide-binding protein G(i) subunit alpha OS=Mus musculus GN=Gnai3 PE=1 SV=3                                               |
| Q8VQ37-2  | Sgip1   | 1.000279267             | 0.00040284       | 0.995448763     | 0.001981089   | Isoform 2 of SH3-containing GRB2-like protein 3-interacting protein 1 OS=Mus musculus GN=Sgip1                                         |
| Q8KC29    | ptplad1 | 0.999392822             | -0.000876238     | 0.99568135      | 0.001879628   | Very-long-chain (3R)-3-hydroxyacyl-[acyl-carrier protein] dehydratase 3 OS=Mus musculus GN=ptplad1 PE=1 SV=2                           |
| P62855    | Rps26   | 1.000139437             | 0.000460776      | 0.995761362     | 0.001844729   | 40S ribosomal protein S26 OS=Mus musculus GN=Rps26 PE=2 SV=3                                                                           |
| P02104    | Hbb-y   | 0.999112129             | -0.001281497     | 0.995782886     | 0.001835342   | Hemoglobin subunit epsilon-Y2 OS=Mus musculus GN=Hbb-y PE=1 SV=2                                                                       |
| Q3UFY7-4  | Nt5c3b  | 1.001020551             | 0.001471593      | 0.995909001     | 0.001780343   | Isoform 4 of 7-methylguanosine phosphate-specific 5'-nucleotidase OS=Mus musculus GN=Nt5c3b                                            |
| Q640R3    | Hepacam | 1.000182018             | 0.000262573      | 0.9959814       | 0.001748772   | Hepatocyte cell adhesion molecule OS=Mus musculus GN=Hepacam PE=1 SV=2                                                                 |
| Q9D018-2  | Dtd1    | 0.999559765             | -0.000635264     | 0.996137309     | 0.001680794   | Isoform 2 of D-tyrosyl-tRNA(Tyr) deacylase 1 OS=Mus musculus GN=Dtd1                                                                   |
| P70698    | Ctsp1   | 1.000515627             | 0.000743701      | 0.996234498     | 0.001638423   | CTP synthase 1 OS=Mus musculus GN=Ctsp1 PE=1 SV=2                                                                                      |
| Q922D4    | Ppp6r3  | 0.999597994             | -0.000580088     | 0.996837125     | 0.001375796   | Serine/threonine-protein phosphatase 6 regulatory subunit 3 OS=Mus musculus GN=Ppp6r3 PE=1 SV=1                                        |
| O08586    | Pten    | 1.000264398             | 0.000381396      | 0.99689487      | 0.001350639   | Phosphatidylinositol 3,4,5-trisphosphate 3-phosphatase and dual-specificity protein phosphatase PTEN OS=Mus musculus GN=Pten PE=1 SV=1 |
| Q91XU3    | Pip4k2c | 0.999592004             | -0.000588734     | 0.997176596     | 0.001227923   | Phosphatidylinositol 5-phosphate 4-kinase type-2 gamma OS=Mus musculus GN=Pip4k2c PE=2 SV=1                                            |
| Q6P9K9-2  | Nrxn3   | 1.000235208             | 0.000339294      | 0.997324147     | 0.001163666   | Isoform 2a of Neuroligin-3 OS=Mus musculus GN=Nrxn3                                                                                    |
| Q99KP6-3  | Prpf19  | 0.999346732             | -0.000942774     | 0.997481622     | 0.001095097   | Isoform 3 of Pre-mRNA-processing factor 19 OS=Mus musculus GN=Prpf19                                                                   |
| O35127    | Grccl10 | 0.999870648             | -0.000186628     | 0.997619857     | 0.001034915   | Protein C10 OS=Mus musculus GN=Grccl10 PE=2 SV=1                                                                                       |
| Q99N89    | Mrp143  | 0.999403725             | -0.0008605       | 0.997731842     | 0.000986167   | 39S ribosomal protein L43, mitochondrial OS=Mus musculus GN=Mrp143 PE=2 SV=1                                                           |
| Q64516-2  | Gk      | 1.00011537              | 0.000166434      | 0.997769536     | 0.00096976    | Isoform 2 of Glycerol kinase OS=Mus musculus GN=Gk                                                                                     |
| P57774    | Npy     | 1.00019057              | 0.000274908      | 0.997886842     | 0.000918704   | Pro-neuropeptide Y OS=Mus musculus GN=Npy PE=1 SV=2                                                                                    |
| Q9JIV2-2  | Pfn2    | 1.000111479             | 0.000160821      | 0.998144537     | 0.000806566   | Isoform 2 of Profilin-2 OS=Mus musculus GN=Pfn2                                                                                        |
| O89001    | Cpd     | 1.000109092             | 0.000157378      | 0.998258405     | 0.000757025   | Carboxypeptidase D OS=Mus musculus GN=Cpd PE=1 SV=2                                                                                    |
| P70677    | Casp3   | 1.000219528             | 0.000316288      | 0.999135646     | 0.000375547   | Caspase-3 OS=Mus musculus GN=Casp3 PE=1 SV=1                                                                                           |
| AZAL55-3  | Rap1gap | 0.999952482             | -6.85553E-05     | 0.999163736     | 0.000363337   | Isoform 3 of Rap1 GTPase-activating protein 1 OS=Mus musculus GN=Rap1gap                                                               |
| Q6QW9     | Camk2n1 | 1.000188608             | 0.000272078      | 0.999293292     | 0.000307028   | Calcium/calmodulin-dependent protein kinase II inhibitor 1 OS=Mus musculus GN=Camk2n1 PE=1 SV=1                                        |
| Q8R307    | Vps18   | 1.000098324             | 0.000141844      | 0.999348373     | 0.00028309    | Vacuolar protein sorting-associated protein 18 homolog OS=Mus musculus GN=Vps18 PE=1 SV=2                                              |
| Q6PFH08-2 | Erc2    | 1.000003117             | 4.49753E-06      | 0.999893393     | 4.63014E-05   | Isoform 2 of ERC protein 2 OS=Mus musculus GN=Erc2                                                                                     |

























































| Accession | Gene     | Fold Change (KO vs. WT) | Log2 Fold Change | Students T Test | -Log10 T Test | Description                                                                                   |
|-----------|----------|-------------------------|------------------|-----------------|---------------|-----------------------------------------------------------------------------------------------|
| Q9Z2Y8    | Prosc    | 1.002601027             | 0.003747617      | 0.981196097     | 0.008244188   | Proline synthase co-transcribed bacterial homolog protein OS=Mus musculus GN=Prosc PE=1 SV=1  |
| Q8BL65-3  | Ablim2   | 1.015640938             | 0.022390453      | 0.981299105     | 0.008198597   | Isoform 3 of Actin-binding LIM protein 2 OS=Mus musculus GN=Ablim2                            |
| Q8CBW3-3  | Abl1     | 0.999242729             | -0.001092925     | 0.981518867     | 0.008101348   | Isoform 3 of Abl interactor 1 OS=Mus musculus GN=Abl1                                         |
| Q99MR6-3  | Srrt     | 0.999015548             | -0.001420964     | 0.982115536     | 0.007837419   | Isoform C of Serrate RNA effector molecule homolog OS=Mus musculus GN=Srrt                    |
| Q9D7M1    | Gid8     | 1.002617706             | 0.003771617      | 0.982782684     | 0.007542504   | Glucose-induced degradation protein 8 homolog OS=Mus musculus GN=Gid8 PE=2 SV=1               |
| Q9Z268    | Rasa1    | 0.997819947             | -0.003148585     | 0.983577178     | 0.007191557   | RasGAP-activating-like protein 1 OS=Mus musculus GN=Rasa1 PE=2 SV=2                           |
| Q6P9K9-2  | Nrxn3    | 0.999253835             | -0.00107689      | 0.983916239     | 0.007041872   | Isoform 2a of Neuropilin-3 OS=Mus musculus GN=Nrxn3                                           |
| Q9EPK2-3  | Rp2      | 0.997727027             | -0.00328294      | 0.984084275     | 0.006967708   | Isoform 3 of Protein RXP2 OS=Mus musculus GN=Rp2                                              |
| Q9QX56-2  | Dbn1     | 0.999537161             | -0.00066789      | 0.985170667     | 0.006488528   | Isoform A2 of Drebrin OS=Mus musculus GN=Dbn1                                                 |
| P63168    | Dynl1    | 1.002375696             | 0.00342334       | 0.985931772     | 0.006153138   | Dynein light chain 1, cytoplasmic OS=Mus musculus GN=Dynl1 PE=1 SV=1                          |
| Q6Y7W8    | Gigyf2   | 0.998653178             | -0.001944362     | 0.986401618     | 0.005946224   | PERQ amino acid-rich with GYF domain-containing protein 2 OS=Mus musculus GN=Gigyf2 PE=1 SV=2 |
| Q6P5F9    | Xpo1     | 1.001115119             | 0.00160788       | 0.986877297     | 0.005736842   | Exportin-1 OS=Mus musculus GN=Xpo1 PE=1 SV=1                                                  |
| Q5DU31    | Ipcef1   | 0.99748154              | -0.003637953     | 0.986908574     | 0.005723078   | Interactor protein for cytohesin exchange factors 1 OS=Mus musculus GN=Ipcef1 PE=2 SV=2       |
| P47212    | Gal      | 0.998773746             | -0.001770196     | 0.987789088     | 0.005335776   | Galanin peptides OS=Mus musculus GN=Gal PE=2 SV=1                                             |
| P51660    | Hsd17b4  | 0.999314087             | -0.000989902     | 0.988231387     | 0.005141357   | Peroxisomal multifunctional enzyme type 2 OS=Mus musculus GN=Hsd17b4 PE=1 SV=3                |
| Q80T88    | Vat1l    | 0.998219959             | -0.002570344     | 0.98844506      | 0.005047465   | Synaptic vesicle membrane protein VAT-1 homolog-like OS=Mus musculus GN=Vat1l PE=2 SV=2       |
| Q60872    | Eif1a    | 1.001364032             | 0.001966542      | 0.989817946     | 0.004444676   | Eukaryotic translation initiation factor 1A OS=Mus musculus GN=Eif1a PE=2 SV=3                |
| Q8BH57-2  | Wdr48    | 1.000524683             | 0.000756759      | 0.990582941     | 0.004109155   | Isoform 2 of WD repeat-containing protein 48 OS=Mus musculus GN=Wdr48                         |
| Q9CDA1    | Trappc5  | 0.999127893             | -0.001258734     | 0.991313094     | 0.003789157   | Trafficking protein particle complex subunit 5 OS=Mus musculus GN=Trappc5 PE=1 SV=1           |
| Q91WG5    | Prkag2   | 1.013304949             | 0.019068412      | 0.992772216     | 0.003150385   | 5'-AMP-activated protein kinase subunit gamma-2 OS=Mus musculus GN=Prkag2 PE=1 SV=2           |
| Q80VP0    | Tecpr1   | 1.002567483             | 0.003699348      | 0.993142474     | 0.002988444   | Tectonin beta-propeller repeat-containing protein 1 OS=Mus musculus GN=Tecpr1 PE=2 SV=1       |
| B1AXV0    | Frrs1l   | 1.000652678             | 0.000941308      | 0.993751961     | 0.002722001   | DOMON domain-containing protein FRRS1L OS=Mus musculus GN=Frrs1l PE=1 SV=1                    |
| Q91JN2-2  | Pfn2     | 0.999698712             | -0.000434732     | 0.994205876     | 0.002523675   | Isoform 2 of Profilin-2 OS=Mus musculus GN=Pfn2                                               |
| Q08808    | Diaph1   | 1.00166205              | 0.002395841      | 0.994320828     | 0.002473463   | Protein diaphanous homolog 1 OS=Mus musculus GN=Diaph1 PE=1 SV=1                              |
| Q61696    | Hspa1a   | 0.999552514             | -0.00064573      | 0.994337033     | 0.002466385   | Heat shock 70 kDa protein 1A OS=Mus musculus GN=Hspa1a PE=1 SV=2                              |
| P97825    | Hn1      | 0.999275778             | -0.00104521      | 0.994682089     | 0.002315702   | Hematological and neurological expressed 1 protein OS=Mus musculus GN=Hn1 PE=1 SV=3           |
| Q88LE7    | Slc17a6  | 0.99971132              | -0.000413824     | 0.997335792     | 0.001158595   | Vesicular glutamate transporter 2 OS=Mus musculus GN=Slc17a6 PE=1 SV=1                        |
| Q8VE88    | Fam114a2 | 0.999918867             | -0.000117055     | 0.998287269     | 0.000744467   | Protein FAM114A2 OS=Mus musculus GN=Fam114a2 PE=2 SV=2                                        |
| A4Q9F0    | Ttlf7    | 1.000057756             | 8.33216E-05      | 0.999371703     | 0.000272952   | Tubulin polyglutamylase TTL7 OS=Mus musculus GN=Ttlf7 PE=1 SV=1                               |
