# Supplementary material
Source: PubMed Central journal article supplement (PMC6204122)
Supplement: NIHMS944714-supplement-2.pdf [file NIHMS944714-supplement-2.pdf]

| Accession | Gene     | Log2 fold change in Bumetanide | Students T Test in Bumetanide | -Log10 T Test in Bumetanide | Log2 fold change in Vehicle | Students T Test in Vehicle | -Log10 T Test in Vehicle | Description                                                                                    |
|-----------|----------|--------------------------------|-------------------------------|-----------------------------|-----------------------------|----------------------------|--------------------------|------------------------------------------------------------------------------------------------|
| Q8D059    | Hint2    | 0.225902255                    | 0.000454942                   | 3.342044259                 | 0.357433033                 | 0.009360553                | 2.028698498              | Histidine triad nucleotide-binding protein 2, mitochondrial OS=Mus musculus GN=Hint2 PE=1 SV=1 |
| O54774    | Ap3d1    | 0.117959208                    | 0.001289174                   | 2.88968858                  | 0.110062999                 | 0.022340333                | 1.650910363              | AP-3 complex subunit delta-1 OS=Mus musculus GN=Ap3d1 PE=1 SV=1                                |
| Q9CR26    | Vta1     | 0.215047923                    | 0.002166139                   | 2.664313744                 | 0.141807877                 | 0.03722268                 | 1.429192361              | Vacuolar protein sorting-associated protein VTA1 homolog OS=Mus musculus GN=Vta1 PE=1 SV=1     |
| Q9R1Q8    | Ta9ln3   | 0.139660435                    | 0.003137583                   | 2.503404809                 | 0.137339615                 | 0.03023207                 | 1.51953211               | Transgelin-3 OS=Mus musculus GN=Ta9ln3 PE=1 SV=1                                               |
| P62814    | Atp6v1b2 | 0.191394109                    | 0.004044406                   | 2.39314526                  | 0.157394653                 | 0.04251016                 | 1.371507265              | V-type proton ATPase subunit B, brain isoform OS=Mus musculus GN=Atp6v1b2 PE=1 SV=1            |
| Q8BLQ9-3  | Cadm2    | 0.184787207                    | 0.00557958                    | 2.253398515                 | 0.15125273                  | 0.0093809                  | 2.027755261              | Isoform 3 of Cell adhesion molecule 2 OS=Mus musculus GN=Cadm2                                 |
| Q8C8R3    | Ank2     | 0.071533052                    | 0.016696027                   | 1.777386855                 | 0.083313693                 | 0.008364644                | 2.077552561              | Ankyrin-2 OS=Mus musculus GN=Ank2 PE=1 SV=2                                                    |
| Q91296    | Bmp2k    | 0.229869563                    | 0.018261545                   | 1.738462475                 | 0.250991872                 | 0.044750336                | 1.349203704              | BMP-2-inducible protein kinase OS=Mus musculus GN=Bmp2k PE=1 SV=1                              |
| Q8917     | Fli1t1   | 0.13289854                     | 0.01862837                    | 1.729825137                 | 0.216479846                 | 0.000400149                | 3.397778029              | Flihitin-1 OS=Mus musculus GN=Fli1t1 PE=1 SV=1                                                 |
| Q8C8R3-2  | Ank2     | 0.067028048                    | 0.02391226                    | 1.64992213                  | 0.070557988                 | 0.017571554                | 1.755189826              | Isoform 2 of Ankyrin-2 OS=Mus musculus GN=Ank2                                                 |
| Q922Q6    | Sept5    | 0.281118361                    | 0.028110339                   | 1.55113392                  | 0.114423921                 | 0.048301057                | 1.316043364              | Septin-5 OS=Mus musculus GN=Sept5 PE=1 SV=2                                                    |
| Q8K4Z3    | Apoa1bp  | 0.12850447                     | 0.035977705                   | 1.44396654                  | 0.111918648                 | 0.004815362                | 2.31737109               | NAD(P)H-hydrate epimerase OS=Mus musculus GN=Apoa1bp PE=1 SV=1                                 |

| Accession | Gene    | Log2 fold change in Bumetanide | Students T Test in Bumetanide | -Log10 T Test in Bumetanide | Log2 fold change in Vehicle | Students T Test in Vehicle | -Log10 T Test in Vehicle | Description                                                                                            |
|-----------|---------|--------------------------------|-------------------------------|-----------------------------|-----------------------------|----------------------------|--------------------------|--------------------------------------------------------------------------------------------------------|
| Q99M71    | Epdrl   | 0.439206302                    | 0.000225228                   | 3.647377589                 | -0.147901954                | 0.046238142                | 1.334999621              | Mammalian ependymin-related protein 1 OS=Mus musculus GN=Epdrl PE=2 SV=1                               |
| P32848    | Pvalb   | 0.530440082                    | 0.000324134                   | 3.489274873                 | -0.570253515                | 0.003207377                | 2.493850031              | Parvalbumin alpha OS=Mus musculus GN=Pvalb PE=1 SV=3                                                   |
| P52502    | Gpi2    | 0.259820055                    | 0.00404344                    | 3.388974156                 | -0.123156436                | 0.098337315                | 2.078973797              | Aspartate aminotransferase, mitochondrial OS=Mus musculus GN=Gpi2 PE=1 SV=1                            |
| Q92249    | Sucla2  | 0.192479308                    | 0.001701424                   | 2.769187427                 | -0.082746247                | 0.04569791                 | 1.340103666              | Succinyl-CoA ligase [ADP-forming] subunit beta, mitochondrial OS=Mus musculus GN=Sucla2 PE=1 SV=2      |
| P63328-2  | Ppp3ca  | 0.152581195                    | 0.002078636                   | 2.682221453                 | -0.125169707                | 0.03589591                 | 1.444955036              | Isoform 2 of Serine/threonine-protein phosphatase 2B catalytic subunit alpha OS=Mus musculus GN=Ppp3ca |
| P35123    | Usp4    | 0.41858301                     | 0.002095623                   | 2.678686827                 | -0.267538254                | 0.037000183                | 1.431796133              | Ubiquitin carboxyl-terminal hydrolase 4 OS=Mus musculus GN=Usp4 PE=1 SV=3                              |
| P63380    | Ube2l   | 0.209811789                    | 0.005668227                   | 2.24655277                  | -0.13719616                 | 0.049839895                | 1.302348636              | SUMO-conjugating enzyme UBC9 OS=Mus musculus GN=Ube2l PE=1 SV=1                                        |
| Q04447    | Ckb     | 0.257994717                    | 0.006282514                   | 2.201866510                 | -0.112497204                | 0.048045298                | 1.318349112              | Creatine kinase B-type OS=Mus musculus GN=Ckb PE=1 SV=1                                                |
| P15209    | Ntrk2   | 0.324205478                    | 0.008617028                   | 2.064642489                 | -0.093066077                | 0.048189883                | 1.317044128              | BDNF/NT-3 growth factors receptor OS=Mus musculus GN=Ntrk2 PE=1 SV=1                                   |
| Q92201    | Marc2   | 0.176408786                    | 0.00958653                    | 2.018338574                 | -0.156369993                | 0.025335132                | 1.596276832              | MOS domain-containing protein 2, mitochondrial OS=Mus musculus GN=Marc2 PE=1 SV=1                      |
| P15209-4  | Ntrk2   | 0.337497073                    | 0.010551817                   | 1.97667273                  | -0.135674354                | 0.015165605                | 1.819140267              | Isoform 1D of BDNF/NT-3 growth factors receptor OS=Mus musculus GN=Ntrk2                               |
| Q88V5-3   | Cadps2  | 0.120989953                    | 0.014948232                   | 1.925410166                 | -0.129416512                | 0.024507478                | 1.610701381              | Isoform 3 of Calcium-dependent secretion activator 2 OS=Mus musculus GN=Cadps2                         |
| Q9WVC2-2  | Lynx1   | 0.102177981                    | 0.018589177                   | 1.73073983                  | -0.226813711                | 0.023561219                | 1.627802248              | Isoform 2 of Ly-6/neurotoxin-like protein 1 OS=Mus musculus GN=Lynx1                                   |
| P46460    | Nsf     | 0.108069484                    | 0.02322648                    | 1.634016602                 | -0.074699874                | 0.04089323                 | 1.388348583              | Vesicle-fusing ATPase OS=Mus musculus GN=Nsf PE=1 SV=2                                                 |
| Q81110    | Atpaf1  | 0.334870853                    | 0.024400999                   | 1.612592387                 | -0.2990685                  | 0.041106531                | 1.386089169              | ATP synthase mitochondrial F1 complex assembly factor 1 OS=Mus musculus GN=Atpaf1 PE=2 SV=1            |
| Q99075    | Ak1     | 0.069056119                    | 0.034925117                   | 1.603362797                 | -0.078478541                | 0.01671868                 | 1.776798019              | Adenylylate kinase isoenzyme 1 OS=Mus musculus GN=Ak1 PE=1 SV=1                                        |
| Q88W70    | Alh15a1 | 0.148742215                    | 0.025183573                   | 1.598882647                 | -0.093718007                | 0.038069369                | 1.415424319              | Succinate-semialdehyde dehydrogenase, mitochondrial OS=Mus musculus GN=Alh15a1 PE=1 SV=1               |
| Q9CYR6    | Map1a   | 0.064197679                    | 0.045703505                   | 1.340050493                 | -0.108581044                | 0.010691081                | 1.970978374              | Microtubule-associated protein 1A OS=Mus musculus GN=Map1a PE=1 SV=2                                   |
| Q91WC3    | Acsl6   | 0.080088318                    | 0.047384334                   | 1.32436522                  | -0.121007018                | 0.007147441                | 2.145849418              | Long-chain-fatty-acid-CoA ligase 6 OS=Mus musculus GN=Acsl6 PE=2 SV=1                                  |
| Q88MF3    | Me3     | 0.131719801                    | 0.047441661                   | 1.323840115                 | -0.231579628                | 0.0002823                  | 3.549289558              | NADP-dependent malic enzyme, mitochondrial OS=Mus musculus GN=Me3 PE=1 SV=2                            |
| Q80U23-3  | Sngp    | 0.129189473                    | 0.04892683                    | 1.310452925                 | -0.271440656                | 0.049944505                | 1.30151229               | Isoform 3 of Syntaphin OS=Mus musculus GN=Sngp                                                         |







| Accession | Gene    | Log2 fold change in Bumetanide | Students T Test in Bumetanide | -Log10 T Test in Bumetanide | Log2 fold change in Vehicle | Students T Test in Vehicle | -Log10 T Test in Vehicle | Description                                                                               |
|-----------|---------|--------------------------------|-------------------------------|-----------------------------|-----------------------------|----------------------------|--------------------------|-------------------------------------------------------------------------------------------|
| P62960    | Ybx1    | -0.623837411                   | 0.007644035                   | 2.116677337                 | 0.418249397                 | 0.019428276                | 1.711565732              | Nuclease-sensitive element-binding protein 1 OS=Mus musculus GN=Ybx1 PE=1 SV=3            |
| P11627    | Licam   | -0.10841576                    | 0.021016545                   | 1.677438669                 | 0.112688024                 | 0.044088127                | 1.355678355              | Neural cell adhesion molecule L1 OS=Mus musculus GN=Licam PE=1 SV=1                       |
| P28667    | Marcks1 | -0.316361508                   | 0.035111951                   | 1.454545035                 | 0.342784543                 | 0.035683438                | 1.447533304              | MARCKS-related protein OS=Mus musculus GN=Marcks1 PE=1 SV=2                               |
| O55022    | Pgrmc1  | -0.139844824                   | 0.042382795                   | 1.372810407                 | 0.144440011                 | 0.028107656                | 1.551175367              | Membrane-associated progesterone receptor component 1 OS=Mus musculus GN=Pgrmc1 PE=1 SV=4 |
| P62196    | Psmc5   | -0.118797025                   | 0.043350619                   | 1.363004696                 | 0.095282336                 | 0.021924399                | 1.659072313              | 26S protease regulatory subunit 8 OS=Mus musculus GN=Psmc5 PE=1 SV=1                      |

| Accession | Gene  | Log2 fold change in Bumetanide | Students T Test in Bumetanide | -Log10 T Test in Bumetanide | Log2 fold change in Vehicle | Students T Test in Vehicle | -Log10 T Test in Vehicle | Description                                                                             |
|-----------|-------|--------------------------------|-------------------------------|-----------------------------|-----------------------------|----------------------------|--------------------------|-----------------------------------------------------------------------------------------|
| P35922-11 | Fmr1  | -2.743885774                   | 1.7217E-07                    | 6.76404237                  | -1.802813034                | 1.40237E-07                | 6.853137195              | Isoform ISO11 of Fragile X mental retardation protein 1 homolog OS=Mus musculus GN=Fmr1 |
| Q61171    | Prdx2 | -0.143816772                   | 0.023074342                   | 1.63687067                  | -0.077083109                | 0.037231922                | 1.429084547              | Peroxiredoxin-2 OS=Mus musculus GN=Prdx2 PE=1 SV=3                                      |
| P14148    | Rpl7  | -0.127349371                   | 0.026070756                   | 1.58384637                  | -0.110434374                | 0.020600234                | 1.686127842              | 60S ribosomal protein L7 OS=Mus musculus GN=Rpl7 PE=1 SV=2                              |









| Accession | Gene     | Log2 fold change in Bumetanide | Students T Test in Bumetanide | -Log10 T Test in Bumetanide | Log2 fold change in Vehicle | Students T Test in Vehicle | -Log10 T Test in Vehicle | Description                                                                                                      |
|-----------|----------|--------------------------------|-------------------------------|-----------------------------|-----------------------------|----------------------------|--------------------------|------------------------------------------------------------------------------------------------------------------|
| Q8RA29    | Atp2a1   | -0.08084035                    | 0.052346575                   | 1.28111732                  | -0.126713843                | 0.040684413                | 2.329344839              | Sarcoplasmic/endoplasmic reticulum calcium ATPase 1 OS=Mus musculus GN=Atp2a1 PE=2 SV=1                          |
| Q3TVW9    | Cdccl136 | 0.321711151                    | 0.053290036                   | 1.27335983                  | -0.1246315                  | 0.014562474                | 1.836711161              | Coiled-coil domain-containing protein 136 OS=Mus musculus GN=Cdccl136 PE=2 SV=2                                  |
| Q521W8    | Atp2a2   | 0.140440412                    | 0.054043007                   | 1.255271809                 | -0.183248422                | 0.029777771                | 1.526107811              | Potassium-transporting ATPase alpha chain 2 OS=Mus musculus GN=Atp2a2 PE=1 SV=3                                  |
| PA2669    | Pura     | 0.089743585                    | 0.057949634                   | 1.236949303                 | -0.209729463                | 0.044053036                | 1.356024151              | Transcriptional activator protein Pur-alpha OS=Mus musculus GN=Pura PE=1 SV=1                                    |
| Q64436    | Atp4a    | 0.139521121                    | 0.06294975                    | 1.201005988                 | -0.181983246                | 0.019190856                | 1.496088761              | Potassium-transporting ATPase alpha chain 1 OS=Mus musculus GN=Atp4a PE=1 SV=3                                   |
| Q8R5M8-3  | Cadm1    | 0.123262822                    | 0.067166397                   | 1.172847945                 | -0.33063736                 | 0.015348621                | 1.813902333              | Isomorph 3 of Cell adhesion molecule 1 OS=Mus musculus GN=Cadm1                                                  |
| Q9C006    | Mrip24   | 0.364364641                    | 0.108824021                   | 0.963275232                 | -0.51593212                 | 0.000575661                | 3.239833118              | 39S ribosomal protein L24, mitochondrial OS=Mus musculus GN=Mrip24 PE=2 SV=1                                     |
| Q325N0    | Sfn5     | 0.096108707                    | 0.115630529                   | 0.936927488                 | -0.116109138                | 0.024917757                | 1.603491055              | Sideroflexin-5 OS=Mus musculus GN=Sfn5 PE=1 SV=2                                                                 |
| Q8C1B1    | Camsap2  | -0.205548555                   | 0.11662331                    | 0.933214635                 | -0.151289105                | 0.01720852                 | 1.764256469              | Calmodulin-regulated spectrin-associated protein 2 OS=Mus musculus GN=Camsap2 PE=1 SV=3                          |
| P24549    | Rab27a   | 0.539713111                    | 0.116914435                   | 0.932131864                 | -0.26294193                 | 0.015004                   | 1.823792932              | Retinal dehydrogenase 1 OS=Mus musculus GN=Alid1a1 PE=1 SV=5                                                     |
| Q9M9N9    | Pccb     | 0.057886539                    | 0.187926772                   | 0.726011346                 | -0.287156481                | 0.0210658                  | 1.676422051              | Propionyl-CoA carboxylase beta chain, mitochondrial OS=Mus musculus GN=Pccb PE=1 SV=2                            |
| Q9VD08    | Sirt2    | 0.199774803                    | 0.201916885                   | 0.694827363                 | -0.145118604                | 0.043429529                | 1.362214877              | NAD-dependent protein deacetylase sirtuin-2 OS=Mus musculus GN=Sirt2 PE=1 SV=2                                   |
| Q312R2    | Sna48    | 0.268966339                    | 0.215131511                   | 0.678728997                 | -0.609400201                | 0.029969773                | 1.523316547              | Sorting nexin-18 OS=Mus musculus GN=Sna18 PE=1 SV=1                                                              |
| Q91V92    | Atcy     | -0.039558697                   | 0.217523456                   | 0.662493906                 | -0.103070953                | 0.046363972                | 1.333819368              | ATP-citrate synthase OS=Mus musculus GN=Atcy PE=1 SV=1                                                           |
| O55143    | Atp2a2   | -0.060517599                   | 0.218525859                   | 0.660497164                 | -0.096610348                | 0.021319148                | 1.669765914              | Sarcoplasmic/endoplasmic reticulum calcium ATPase 2 OS=Mus musculus GN=Atp2a2 PE=1 SV=2                          |
| Q64444    | Ca4      | 0.178710065                    | 0.223390859                   | 0.650934602                 | -0.28010586                 | 0.001759923                | 2.754506224              | Carbonic anhydrase 4 OS=Mus musculus GN=Ca4 PE=1 SV=1                                                            |
| Q99K07    | Ppilf    | 0.278198584                    | 0.262408131                   | 0.58102712                  | -0.189926087                | 0.032955839                | 1.482067629              | Peptidyl-prolyl cis-trans isomerase F, mitochondrial OS=Mus musculus GN=Ppilf PE=1 SV=1                          |
| Q99K05    | Mrip3    | -0.082317254                   | 0.269058557                   | 0.570153191                 | -0.167654951                | 0.042556653                | 1.371032334              | 39S ribosomal protein L3, mitochondrial OS=Mus musculus GN=Mrip3 PE=2 SV=1                                       |
| Q99K85    | Pstt1    | 0.0557516                      | 0.270797602                   | 0.567355186                 | -0.142568939                | 0.002286661                | 2.640798211              | Phosphoserine aminotransferase OS=Mus musculus GN=Pstt1 PE=1 SV=1                                                |
| Q8C167-4  | Prepl    | -0.135121981                   | 0.273321533                   | 0.56326152                  | -0.18099289                 | 0.031862969                | 1.496713758              | Isomorph 4 of Prolyl endopeptidase-like OS=Mus musculus GN=Prepl                                                 |
| Q7TMF3    | Ndufa12  | 0.07541074                     | 0.283492039                   | 0.547459132                 | -0.1788072                  | 0.008847237                | 2.053192358              | NADH dehydrogenase [ubiquinone] 1 alpha subcomplex subunit 12 OS=Mus musculus GN=Ndufa12 PE=2 SV=2               |
| Q64518-3  | Atp2a3   | -0.190244488                   | 0.30231808                    | 0.519535879                 | -0.135309674                | 0.040521922                | 1.392309963              | Isomorph SERCA3 of Sarcoplasmic/endoplasmic reticulum calcium ATPase 3 OS=Mus musculus GN=Atp2a3                 |
| P36916-2  | Gnl1     | 0.126061615                    | 0.307480376                   | 0.512353224                 | -0.184637115                | 0.04048313                 | 1.392725915              | Isomorph 2 of Guanine nucleotide-binding protein-like 1 OS=Mus musculus GN=Gnl1                                  |
| Q3UH60    | Dip2b    | -0.187827995                   | 0.353719111                   | 0.451341476                 | -0.157436361                | 0.034949008                | 1.456565151              | Disco-interacting protein 2 homolog B OS=Mus musculus GN=Dip2b PE=1 SV=1                                         |
| Q8C181-3  | Mbnl2    | -0.148163925                   | 0.357070008                   | 0.447323259                 | -0.178623164                | 0.047145027                | 1.326564107              | Isomorph 3 of Muscledin-like protein 2 OS=Mus musculus GN=Mbnl2                                                  |
| P97820    | Map4k4   | -0.109968942                   | 0.362503427                   | 0.440687883                 | -0.1523128                  | 0.008224173                | 2.084879263              | Mitogen-activated protein kinase kinase kinase 4 OS=Mus musculus GN=Map4k4 PE=1 SV=1                             |
| P26040    | Esr2     | 0.057225853                    | 0.381871422                   | 0.418310587                 | -0.133912159                | 0.001964545                | 2.706738111              | Erin OS=Mus musculus GN=Esr PE=1 SV=3                                                                            |
| Q9CFC1    | Cox6c    | 0.081738237                    | 0.408496809                   | 0.388811332                 | -0.174866976                | 0.01513009                 | 1.808826035              | Cytochrome c oxidase subunit 6C OS=Mus musculus GN=Cox6c PE=1 SV=3                                               |
| Q9D8W7    | Oxid2    | 0.164421869                    | 0.425431876                   | 0.371169974                 | -0.163394604                | 0.048585563                | 1.313492761              | Oxid domain-containing protein 2 OS=Mus musculus GN=Oxid2 PE=1 SV=1                                              |
| O53582    | Eoc4     | 0.099651154                    | 0.483522938                   | 0.315582938                 | -0.180393119                | 0.000436593                | 3.359923432              | Exocyst complex component 4 OS=Mus musculus GN=Eoc4 PE=1 SV=2                                                    |
| P36916    | Gnl1     | 0.053266951                    | 0.512849581                   | 0.290099955                 | -0.174121651                | 0.019757287                | 1.704272696              | Guanine nucleotide-binding protein-like 1 OS=Mus musculus GN=Gnl1 PE=2 SV=4                                      |
| Q3TDK6    | Rogt1    | 0.046710422                    | 0.536305664                   | 0.270587617                 | -0.102410007                | 0.019003721                | 1.721161353              | Protein rog1 homolog OS=Mus musculus GN=Rogt1 PE=2 SV=2                                                          |
| Q3TDK6    | Rogt1    | 0.046713568                    | 0.545472867                   | 0.263944001                 | -0.088278332                | 0.018614342                | 1.729859396              | Isomorph 3 of Protein rog1 homolog OS=Mus musculus GN=Rogt1                                                      |
| Q9IKK1    | Sx6      | -0.135435802                   | 0.556367238                   | 0.254638451                 | -0.115586125                | 0.046050863                | 1.336762225              | Syntaxin 6 OS=Mus musculus GN=Sx6 PE=1 SV=1                                                                      |
| O70250    | Pgpm2    | -0.036026792                   | 0.562197345                   | 0.250273745                 | -0.152207566                | 0.029072019                | 1.536551691              | Phosphoglycerate mutase 2 OS=Mus musculus GN=Pgpm2 SV=3                                                          |
| Q6Y685    | Tacc1    | 0.237176291                    | 0.583116988                   | 0.234244321                 | -0.245951672                | 0.009217057                | 2.035407747              | Transforming acidic coiled-coil-containing protein 1 OS=Mus musculus GN=Tacc1 PE=1 SV=1                          |
| Q7TPV4    | Mybpb1a  | 0.055968149                    | 0.594865312                   | 0.25581355                  | -0.594078064                | 0.03243808                 | 1.488944835              | Myb-binding protein 1A OS=Mus musculus GN=Mybpb1a PE=1 SV=2                                                      |
| PA0336    | Vsp26a   | 0.097565905                    | 0.641281487                   | 0.192951298                 | -0.187619653                | 0.014116984                | 1.850258068              | Vascular protein sorting-associated protein 26A OS=Mus musculus GN=Vsp26a PE=2 SV=1                              |
| Q8C0Y8    | Nf2      | 0.020575278                    | 0.657310827                   | 0.182229214                 | -0.089605084                | 0.011649072                | 1.93370886               | UDP-N-acetylglucosamine-peptide N-acetylglucosaminyltransferase 110 kDa subunit OS=Mus musculus GN=Nf2 PE=1 SV=2 |
| PA4662    | Qgt      | 0.053531843                    | 0.661575741                   | 0.179420428                 | -0.151988869                | 0.047074222                | 1.327216853              | Merlin OS=Mus musculus GN=Qgt PE=1 SV=2                                                                          |
| AGH523    | Eoc6b    | 0.123483094                    | 0.673408474                   | 0.171721424                 | -0.123206306                | 0.033416981                | 1.476302793              | Exocyst complex component 6B OS=Mus musculus GN=Eoc6b PE=2 SV=1                                                  |
| Q99P98    | Rab27b   | 0.061039447                    | 0.737608084                   | 0.132174332                 | -0.208351672                | 0.047086331                | 1.327105153              | Ras-related protein Rab-27B OS=Mus musculus GN=Rab27b PE=1 SV=3                                                  |
| Q88F1     | Nceh1    | 0.058574733                    | 0.740852046                   | 0.13028916                  | -0.204973629                | 0.021115596                | 1.916421175              | Neutral cholesterol ester hydrolase 1 OS=Mus musculus GN=Nceh1 PE=1 SV=1                                         |
| Q7TNG5    | Enl2     | -0.097187402                   | 0.783019588                   | 0.106227374                 | -0.239051215                | 0.018267812                | 1.738313455              | Echinoderm microtubule-associated protein-like 2 OS=Mus musculus GN=Enl2 PE=2 SV=1                               |
| Q3UV70    | Pdp1     | 0.036222408                    | 0.785334817                   | 0.104945148                 | -0.195784271                | 0.008120569                | 2.009948676              | [Pyruvate dehydrogenase [acetyl-transferring]]-phosphatase 1, mitochondrial OS=Mus musculus GN=Pdp1 PE=2 SV=1    |
| PS5264    | Adk      | -0.014389746                   | 0.79639349                    | 0.098872299                 | -0.12905967                 | 0.009940458                | 2.002593617              | Adenosine kinase OS=Mus musculus GN=Adk PE=1 SV=2                                                                |
| PS5264-2  | Adk      | -0.01424927                    | 0.800139988                   | 0.096839563                 | -0.130815845                | 0.015942228                | 1.797450981              | Isomorph Short of Adenosine kinase OS=Mus musculus GN=Adk                                                        |
| Q32130    | Hmnpd1   | 0.022336209                    | 0.854209369                   | 0.068435469                 | -0.144055198                | 0.032207453                | 1.492404523              | Heterogeneous nuclear ribonucleoprotein D-like OS=Mus musculus GN=Hmnpd1 PE=1 SV=1                               |
| PA9442    | Ippp1    | -0.007167903                   | 0.927865083                   | 0.032515168                 | -0.147435804                | 0.00578931                 | 2.237373203              | Inositol polyphosphate 1-phosphatase OS=Mus musculus GN=Ippp1 PE=1 SV=2                                          |
| Q64514    | Tpp2     | -0.001950674                   | 0.96722888                    | 0.014470745                 | -0.128024529                | 0.04707121                 | 1.327244635              | Tripeptidyl-peptidase 2 OS=Mus musculus GN=Tpp2 PE=1 SV=3                                                        |
| Q9C0A1    | Trapp5   | -0.001285734                   | 0.991313094                   | 0.003789157                 | -0.269789525                | 0.02959477                 | 1.528785033              | Trafficking protein particle complex subunit 5 OS=Mus musculus GN=Trapp5 PE=1 SV=1                               |

























Table with columns: Accession, Gene, Log2 fold change in Bumentamide, Students T Test in Bumentamide, Log10 T Test in Bumentamide, Log2 fold change in Vehicle, Students T Test in Vehicle, Log10 T Test in Vehicle, Description. The table lists numerous genes and their associated protein products and functions, such as Dctn3, Pgm, LaminB3, Ankks1, Rpn1, Irf1, Irf2, Irf3, Irf4, Irf5, Irf7, Irf8, Irf9, Irf10, Irf11, Irf12, Irf13, Irf14, Irf15, Irf16, Irf17, Irf18, Irf19, Irf20, Irf21, Irf22, Irf23, Irf24, Irf25, Irf26, Irf27, Irf28, Irf29, Irf30, Irf31, Irf32, Irf33, Irf34, Irf35, Irf36, Irf37, Irf38, Irf39, Irf40, Irf41, Irf42, Irf43, Irf44, Irf45, Irf46, Irf47, Irf48, Irf49, Irf50, Irf51, Irf52, Irf53, Irf54, Irf55, Irf56, Irf57, Irf58, Irf59, Irf60, Irf61, Irf62, Irf63, Irf64, Irf65, Irf66, Irf67, Irf68, Irf69, Irf70, Irf71, Irf72, Irf73, Irf74, Irf75, Irf76, Irf77, Irf78, Irf79, Irf80, Irf81, Irf82, Irf83, Irf84, Irf85, Irf86, Irf87, Irf88, Irf89, Irf90, Irf91, Irf92, Irf93, Irf94, Irf95, Irf96, Irf97, Irf98, Irf99, Irf100.

Bum insignificant, Veh insign

Table with columns: Accession, Gene, Log2 fold change in Butanetide, Students T Test in Butanetide, Log10 T Test in Butanetide, Log2 fold change in Vehicle, Students T Test in Vehicle, Log10 T Test in Vehicle, Description. The table lists numerous genes and their associated expression changes and statistical significance across different conditions.





| Accession | Gene     | Log2 fold change in Bumatandite | Students T Test in Bumatandite | Log10 T Test in Bumatandite | Log2 fold change in Vehicle | Students T Test in Vehicle | Log10 T Test in Vehicle | Description                                                                                          |
|-----------|----------|---------------------------------|--------------------------------|-----------------------------|-----------------------------|----------------------------|-------------------------|------------------------------------------------------------------------------------------------------|
| P06801    | Me1      | -0.001545452                    | 0.968229906                    | 0.014021507                 | 0.079873988                 | 0.140111401                | 0.85326523              | NADP-dependent malic enzyme OS=Mus musculus GN=Me1 PE=1 SV=2                                         |
| Q99910    | Ntm      | 0.005088557                     | 0.968765051                    | 0.013781537                 | 0.051283447                 | 0.381050406                | 0.419017981             | Neurotrophin OS=Mus musculus GN=Ntm PE=2 SV=2                                                        |
| Q88867    | Yme111   | -0.005912439                    | 0.968758671                    | 0.013444631                 | -0.029793517                | 0.613455474                | 0.215005706             | ATP-dependent zinc metalloprotease YME111 OS=Mus musculus GN=Yme111 PE=2 SV=1                        |
| Q90773    | Mip2     | 0.005822236                     | 0.968868966                    | 0.013286937                 | -0.218615645                | 0.065536142                | 1.183519128             | 395 ribosomal protein L2, mitochondrial OS=Mus musculus GN=Mip2 PE=2 SV=1                            |
| Q2NL51    | Gsk3a    | -0.005249449                    | 0.970350092                    | 0.013071549                 | -0.017913195                | 0.788773541                | 0.103047666             | Glycogen synthase kinase-3 alpha OS=Mus musculus GN=Gsk3a PE=1 SV=2                                  |
| Q99109    | Wdr77    | -0.007497767                    | 0.971012021                    | 0.012775394                 | 0.009621417                 | 0.462801853                | 0.334604911             | Methylkosime protein 50 OS=Mus musculus GN=Wdr77 PE=1 SV=1                                           |
| Q9D116    | Mip14    | -0.003762001                    | 0.971991053                    | 0.012333733                 | -0.005313357                | 0.932092512                | 0.002540935             | 395 ribosomal protein L14, mitochondrial OS=Mus musculus GN=Mip14 PE=2 SV=1                          |
| Q9D895    | Cmpk1    | 0.001624901                     | 0.97231191                     | 0.012194384                 | -0.02524891                 | 0.846966785                | 0.072133621             | UMP-CMP kinase OS=Mus musculus GN=Cmpk1 PE=1 SV=1                                                    |
| P46467    | Vps4b    | -0.001113024                    | 0.972599993                    | 0.012065738                 | 0.004939675                 | 0.556924195                | 0.254203914             | Vacuolar protein sorting-associated protein 4B OS=Mus musculus GN=Vps4b PE=1 SV=2                    |
| Q8BT63    | Tcp111   | -0.004928274                    | 0.973252429                    | 0.0116527                   | 0.004119787                 | 0.720294741                | 0.142489756             | T-complex protein 11-like protein 1 OS=Mus musculus GN=Tcp111 PE=2 SV=1                              |
| Q51598    | Gol2     | -0.000704332                    | 0.973879524                    | 0.011494765                 | 0.009252261                 | 0.603245958                | 0.215005709             | Rab GDP dissociation inhibitor beta OS=Mus musculus GN=Gol2 PE=1 SV=1                                |
| Q88H56    | Armc3    | -0.003547917                    | 0.973973149                    | 0.011452035                 | -0.209648673                | 0.308002235                | 0.511446312             | Armadillo repeat-containing X-linked protein 3 OS=Mus musculus GN=Armc3 PE=1 SV=1                    |
| O08532    | Cacna2d1 | 0.002707492                     | 0.974316227                    | 0.011300064                 | 0.012310666                 | 0.72526473                 | 0.139500602             | isoform 2D of Voltage-dependent calcium channel subunit alpha-2/delta-1 OS=Mus musculus GN=Cacna2d1  |
| D32609    | Bn2      | 0.003883332                     | 0.974449819                    | 0.011240521                 | -0.032257698                | 0.891051244                | 0.050097319             | Bridging integrator 2 OS=Mus musculus GN=Bn2 PE=1 SV=1                                               |
| Q8K940    | Appf1    | -0.002060991                    | 0.974838214                    | 0.011156565                 | 0.12071617                  | 0.27524844                 | 0.560275134             | DCC-interacting protein 13-alpha OS=Mus musculus GN=Appf1 PE=1 SV=1                                  |
| Q8C119    | Mical3   | 0.005197919                     | 0.97477694                     | 0.011094753                 | 0.17629244                  | 0.193611176                | 0.712069577             | Protein-methionine sulfoxide oxidase MICAL3 OS=Mus musculus GN=Mical3 PE=2 SV=2                      |
| P18572    | Btg      | -0.001731312                    | 0.974913838                    | 0.011033765                 | 0.003978626                 | 0.917959563                | 0.037176449             | isoform 2 of Basigin OS=Mus musculus GN=Btg                                                          |
| Q9CQZ1    | Hsbp1    | 0.002968146                     | 0.97528184                     | 0.010869862                 | 0.02475451                  | 0.719929438                | 0.142710067             | Heat shock factor-binding protein 1 OS=Mus musculus GN=Hsbp1 PE=2 SV=1                               |
| Q9CPW0    | Ctnnap2  | 0.006360014                     | 0.975789775                    | 0.010644004                 | 0.007103643                 | 0.313282992                | 0.503924577             | Contactin-associated protein-like 2 OS=Mus musculus GN=Ctnnap2 PE=1 SV=2                             |
| P18572    | Btg      | -0.001635406                    | 0.976207375                    | 0.01041799                  | 0.003978626                 | 0.917959563                | 0.037176449             | Basigin OS=Mus musculus GN=Btg PE=1 SV=2                                                             |
| Q04750    | Top1     | 0.005205696                     | 0.976408865                    | 0.010368286                 | 0.058599695                 | 0.253601921                | 0.59584746              | DNA topoisomerase 1 OS=Mus musculus GN=Top1 PE=1 SV=2                                                |
| Q8C8R3    | Ank2     | 0.002359691                     | 0.976951021                    | 0.010127209                 | 0.147021178                 | 0.05789648                 | 1.237347838             | isoform 6 of Ankyrin-2 OS=Mus musculus GN=Ank2                                                       |
| Q9C0C5    | Mtap     | 0.003823737                     | 0.977386283                    | 0.00993376                  | -0.181370922                | 0.369394071                | 0.436397153             | 5-methyl-5'-thioadenosine phosphorylase OS=Mus musculus GN=Mtap PE=1 SV=1                            |
| PC1217    | Ppp1ca   | 0.002415096                     | 0.977800972                    | 0.00914958                  | 0.029465881                 | 0.46899794                 | 0.328829065             | Serine/threonine-protein phosphatase PP1-alpha catalytic subunit OS=Mus musculus GN=Ppp1ca PE=1 SV=1 |
| Q8K050    | Phyhp    | -0.002991013                    | 0.978577696                    | 0.009404687                 | -0.054384582                | 0.715720507                | 0.14292571              | Phytanoyl-CoA hydroxylase-interacting protein OS=Mus musculus GN=Phyhp PE=1 SV=1                     |
| P70398    | Usp9x    | -0.001557847                    | 0.978992671                    | 0.009220559                 | -0.083893594                | 0.35273808                 | 0.452547653             | Probable ubiquitin carboxyl-terminal hydrolase FAF-X OS=Mus musculus GN=Usp9x PE=1 SV=2              |
| Q61598    | Gdi2     | 0.000563692                     | 0.979446409                    | 0.009019322                 | 0.03749854                  | 0.62199545                 | 0.206237863             | isoform 2 of Rab GDP dissociation inhibitor beta OS=Mus musculus GN=Gdi2                             |
| Q9SCC3    | Necr     | 0.001371559                     | 0.980756588                    | 0.00848722                  | -0.003547853                | 0.305059135                | 0.515165965             | Trans-2-enoyl-CoA reductase, mitochondrial OS=Mus musculus GN=Necr PE=1 SV=2                         |
| Q92Y78    | Hars2    | 0.003747617                     | 0.981101917                    | 0.008258576                 | -0.03226933                 | 0.820268375                | 0.086044032             | Probable histidine-tRNA ligase, mitochondrial OS=Mus musculus GN=Hars2 PE=2 SV=1                     |
| Q92Y78    | Prosc    | 0.003747617                     | 0.981196097                    | 0.008244188                 | -0.09356888                 | 0.2008275                  | 0.697176818             | Proline synthase co-transcribed bacterial homolog protein OS=Mus musculus GN=Prosc PE=1 SV=1         |
| Q8BL65    | Abblm2   | 0.022390453                     | 0.981299105                    | 0.008198597                 | -0.024875383                | 0.67822775                 | 0.168624445             | isoform 3 of Actin-binding LIM protein 2 OS=Mus musculus GN=Abblm2                                   |
| Q8C8W3    | Abi1     | -0.001092925                    | 0.981518867                    | 0.008101348                 | -0.048431001                | 0.454234926                | 0.342719476             | isoform 3 of Abi interactor 1 OS=Mus musculus GN=Abi1                                                |
| Q99MR6    | Srrt     | -0.001420964                    | 0.982115536                    | 0.007874129                 | -0.10681102                 | 0.40994981                 | 0.38728991              | isoform C of Serrate RNA effector molecule homolog OS=Mus musculus GN=Srrt                           |
| Q9D7M1    | Gid8     | 0.003771617                     | 0.982782684                    | 0.007582504                 | 0.013928452                 | 0.876537982                | 0.05722926              | Glucose-induced degradation protein 8 homolog OS=Mus musculus GN=Gid8 PE=2 SV=1                      |
| Q6P993    | Nrxn3    | -0.00107689                     | 0.983916239                    | 0.007404172                 | 0.000339294                 | 0.997324147                | 0.001163666             | isoform 2a of Neuroligin-3 OS=Mus musculus GN=Nrxn3                                                  |
| Q9F923    | Rp2      | -0.00232994                     | 0.984084275                    | 0.006994708                 | 0.000313044                 | 0.340383935                | 0.460039945             | isoform 3 of Protein hRP2 OS=Mus musculus GN=Rp2                                                     |
| Q9QX56    | Dbn1     | -0.00066789                     | 0.985170607                    | 0.006488238                 | 0.161039147                 | 0.344215192                | 0.463169966             | isoform A2 of Dreb1n OS=Mus musculus GN=Dbn1                                                         |
| P63168    | Dynl1    | 0.00342334                      | 0.985931772                    | 0.006153138                 | -0.071469929                | 0.568405342                | 0.245341849             | Dynein light chain 1, cytoplasmic OS=Mus musculus GN=Dynl1 PE=1 SV=1                                 |
| Q6P5F9    | Xpo1     | 0.00160788                      | 0.986877297                    | 0.005736842                 | 0.045488074                 | 0.706728684                | 0.150747282             | Exportin-1 OS=Mus musculus GN=Xpo1 PE=1 SV=1                                                         |
| FS1660    | Hsd17b4  | -0.000989902                    | 0.988231387                    | 0.005141357                 | -0.121244435                | 0.931459741                | 0.038035913             | Peroxisomal multifunctional enzyme type 2 OS=Mus musculus GN=Hsd17b4 PE=1 SV=3                       |
| Q80788    | Vat1l    | -0.002579344                    | 0.988445056                    | 0.005047465                 | 0.088383942                 | 0.295633533                | 0.529246571             | Synaptic vesicle membrane protein VAMP1-like OS=Mus musculus GN=Vat1l PE=2 SV=2                      |
| Q80V00    | Tepr1    | 0.003699348                     | 0.993142474                    | 0.002988444                 | 0.49725476                  | 0.073156491                | 1.137471314             | Tectonin beta-propeller repeat-containing protein 1 OS=Mus musculus GN=Tepr1 PE=2 SV=1               |
| B1AXV0    | Frs1l    | 0.000941308                     | 0.993751961                    | 0.002722001                 | -0.069033049                | 0.420264928                | 0.376476852             | DOMON domain-containing protein FRSSL1 OS=Mus musculus GN=Frs1l PE=1 SV=1                            |
| Q9JUV2    | Phn2     | -0.000434732                    | 0.994205876                    | 0.002528675                 | 0.000103021                 | 0.998144537                | 0.000806586             | isoform 2 of Profilin-2 OS=Mus musculus GN=Phn2                                                      |
| Q51696    | Hspa1a   | -0.00064573                     | 0.994337033                    | 0.002466285                 | 0.116086466                 | 0.370218697                | 0.422251121             | Heat shock 70 kDa protein 1A OS=Mus musculus GN=Hspa1a PE=1 SV=2                                     |
| P97825    | Hn1      | -0.00104521                     | 0.994682089                    | 0.002315702                 | -0.24469339                 | 0.100251893                | 0.998907419             | Hematological and neurological expressed 1 protein OS=Mus musculus GN=Hn1 PE=1 SV=3                  |
| Q8BL77    | Slc17a6  | -0.000413824                    | 0.997335715                    | 0.002118955                 | 0.124055515                 | 0.553850126                | 0.256607742             | Vesicular glutamate transporter 2 OS=Mus musculus GN=Slc17a6 PE=1 SV=1                               |
