# Supplementary material
Source: PubMed Central journal article supplement (PMC6204122)
Supplement: NIHMS944714-supplement-3.pdf [file NIHMS944714-supplement-3.pdf]

## Vehicle Group FMRP targets

| Accession | Gene     | Fold Change (KO vs. WT) | Log2 Fold Change | Students T Test | -Log10 T Test | Description                                                                                                    |
|-----------|----------|-------------------------|------------------|-----------------|---------------|----------------------------------------------------------------------------------------------------------------|
| Q91XM9-8  | Dlg2     | 1.075979318             | 0.105650348      | 0.002208582     | 2.655886434   | Isoform 8 of Disks large homolog 2 OS=Mus musculus GN=Dlg2                                                     |
| Q8C8R3-5  | Ank2     | 1.065510177             | 0.091544372      | 0.003757621     | 2.425087075   | Isoform 5 of Ankyrin-2 OS=Mus musculus GN=Ank2                                                                 |
| P63318    | Prkcg    | 1.08629115              | 0.119410829      | 0.00548705      | 2.260661091   | Protein kinase C gamma type OS=Mus musculus GN=Prkcg PE=1 SV=1                                                 |
| Q80TM9-6  | Nisch    | 1.075622486             | 0.105171821      | 0.006444839     | 2.190787895   | Isoform 6 of Nischarin OS=Mus musculus GN=Nisch                                                                |
| P97820    | Map4k4   | 0.899806816             | -0.1523128       | 0.008224713     | 2.084879263   | Mitogen-activated protein kinase kinase kinase 4 OS=Mus musculus GN=Map4k4 PE=1 SV=1                           |
| Q8C8R3    | Ank2     | 1.059448671             | 0.083313693      | 0.008364644     | 2.07752561    | Ankyrin-2 OS=Mus musculus GN=Ank2 PE=1 SV=2                                                                    |
| Q9QYR6    | Map1a    | 0.927499851             | -0.108581044     | 0.010691081     | 1.970978374   | Microtubule-associated protein 1A OS=Mus musculus GN=Map1a PE=1 SV=2                                           |
| Q8R5H6    | Waf1     | 1.081414898             | 0.112920137      | 0.011688166     | 1.932253632   | Wiskott-Aldrich syndrome protein family member 1 OS=Mus musculus GN=Waf1 PE=1 SV=2                             |
| Q91XM9-3  | Dlg2     | 1.067577885             | 0.094341325      | 0.014134174     | 1.84972956    | Isoform 3 of Disks large homolog 2 OS=Mus musculus GN=Dlg2                                                     |
| P15209-4  | Ntrk2    | 0.910244262             | -0.135674354     | 0.015165605     | 1.819140267   | Isoform L10 of BDNF/NT-3 growth factors receptor OS=Mus musculus GN=Ntrk2                                      |
| Q8C8R3-2  | Ank2     | 1.050122759             | 0.070557988      | 0.017571554     | 1.755189826   | Isoform 2 of Ankyrin-2 OS=Mus musculus GN=Ank2                                                                 |
| Q7TNG5    | Eml2     | 0.847302355             | -0.239051215     | 0.018267812     | 1.738313455   | Echinoderm microtubule-associated protein-like 2 OS=Mus musculus GN=Eml2 PE=2 SV=1                             |
| BOV2N1-5  | Ptprs    | 1.071522532             | 0.099662187      | 0.01939093      | 1.712401366   | Isoform 5 of Receptor-type tyrosine-protein phosphatase 5 OS=Mus musculus GN=Ptprs                             |
| Q8C8R3-3  | Ank2     | 1.096181835             | 0.132487133      | 0.020215558     | 1.694314272   | Isoform 3 of Ankyrin-2 OS=Mus musculus GN=Ank2                                                                 |
| O55143    | Atp2a2   | 0.935227756             | -0.096610348     | 0.021391148     | 1.669765914   | Sarcoplasmic/endoplasmic reticulum calcium ATPase 2 OS=Mus musculus GN=Atp2a2 PE=1 SV=2                        |
| Q80TM9-5  | Nisch    | 1.168830607             | 0.225065862      | 0.022019582     | 1.657190938   | Isoform 5 of Nischarin OS=Mus musculus GN=Nisch                                                                |
| O54774    | Ap3d1    | 1.079275365             | 0.110062999      | 0.022340333     | 1.650910363   | AP-3 complex subunit delta-1 OS=Mus musculus GN=Ap3d1 PE=1 SV=1                                                |
| O55143-2  | Atp2a2   | 0.935794006             | -0.095737108     | 0.02294654      | 1.639282783   | Isoform 2 of Sarcoplasmic/endoplasmic reticulum calcium ATPase 2 OS=Mus musculus GN=Atp2a2                     |
| Q9WVC2-2  | Lynx1    | 0.854520074             | -0.226813711     | 0.023561219     | 1.627802248   | Isoform 2 of Ly-6/neurotoxin-like protein 1 OS=Mus musculus GN=Lynx1                                           |
| Q3UH60-2  | Dip2b    | 0.876411099             | -0.19032034      | 0.024046253     | 1.618952584   | Isoform 2 of Disco-interacting protein 2 homolog B OS=Mus musculus GN=Dip2b                                    |
| Q92254    | Pde2a    | 1.132383211             | 0.179362265      | 0.033094803     | 1.480240195   | cGMP-dependent 3',5'-cyclic phosphodiesterase OS=Mus musculus GN=Pde2a PE=1 SV=3                               |
| P60761    | Nrgn     | 1.378599859             | 0.463203773      | 0.034200339     | 1.465969592   | Neurogranin OS=Mus musculus GN=Nrgn PE=1 SV=1                                                                  |
| P56399    | Usp5     | 1.05292108              | 0.074397305      | 0.034810891     | 1.45828486    | Ubiquitin carboxyl-terminal hydrolase 5 OS=Mus musculus GN=Usp5 PE=1 SV=1                                      |
| Q3UH60    | Dip2b    | 0.896587548             | -0.157483631     | 0.034949008     | 1.456565151   | Disco-interacting protein 2 homolog B OS=Mus musculus GN=Dip2b PE=1 SV=1                                       |
| P63328-2  | Ppp3ca   | 0.914357526             | -0.129169707     | 0.03589591      | 1.444955036   | Isoform 2 of Serine/threonine-protein phosphatase 2B catalytic subunit alpha isoform OS=Mus musculus GN=Ppp3ca |
| P62746    | Rhob     | 1.082460939             | 0.114314966      | 0.036860585     | 1.433437778   | Rho-related GTP-binding protein Rhob OS=Mus musculus GN=Rhob PE=1 SV=1                                         |
| P46460    | Nsf      | 0.949539635             | -0.074699874     | 0.04089323      | 1.388348583   | Vesicle-fusing ATPase OS=Mus musculus GN=Nsf PE=1 SV=2                                                         |
| P62814    | Atp6v1b2 | 1.115271262             | 0.157394653      | 0.04251016      | 1.371507265   | V-type proton ATPase subunit B, brain isoform OS=Mus musculus GN=Atp6v1b2 PE=1 SV=1                            |
| O08553    | Dpysl2   | 1.041422281             | 0.058555178      | 0.043146592     | 1.365053506   | Dihydropyrimidinase-related protein 2 OS=Mus musculus GN=Dpysl2 PE=1 SV=2                                      |
| Q9E528-6  | Arhgef7  | 1.095719014             | 0.131877881      | 0.043343709     | 1.363073923   | Isoform F of Rho guanine nucleotide exchange factor 7 OS=Mus musculus GN=Arhgef7                               |
| Q91V92    | Acly     | 0.931049029             | -0.103070953     | 0.046363972     | 1.333819368   | ATP-citrate synthase OS=Mus musculus GN=Acly PE=1 SV=1                                                         |
| Q64487-11 | Ptprd    | 1.088201923             | 0.121946282      | 0.046897645     | 1.328848966   | Isoform K of Receptor-type tyrosine-protein phosphatase delta OS=Mus musculus GN=Ptprd                         |
| Q04447    | Ckb      | 0.919233191             | -0.121497204     | 0.048045298     | 1.318349112   | Creatine kinase B-type OS=Mus musculus GN=Ckb PE=1 SV=1                                                        |
| P15209    | Ntrk2    | 0.937528156             | -0.093066077     | 0.048189883     | 1.317044128   | BDNF/NT-3 growth factors receptor OS=Mus musculus GN=Ntrk2 PE=1 SV=1                                           |
| Q922Q6    | Sept5    | 1.082542692             | 0.114423921      | 0.048301057     | 1.316043364   | Septin-5 OS=Mus musculus GN=Sept5 PE=1 SV=2                                                                    |
| Q5F2E8    | Taok1    | 0.914683604             | -0.128655304     | 0.049479094     | 1.305578262   | Serine/threonine-protein kinase TAO1 OS=Mus musculus GN=Taok1 PE=1 SV=1                                        |
| Q80U23-3  | Snph     | 0.828491812             | -0.271440656     | 0.049944505     | 1.30151229    | Isoform 3 of Syntaphilin OS=Mus musculus GN=Snph                                                               |

## Bumetanide Group FMRP targets

| Accession | Gene     | Fold Change (KO vs. WT) | Log2 Fold Change | Students T Test | -Log10 T Test | Description                                                                                                            |
|-----------|----------|-------------------------|------------------|-----------------|---------------|------------------------------------------------------------------------------------------------------------------------|
| Q80T1-2   | Cadps    | 1.104336426             | 0.143179743      | 1.05672E-06     | 5.97603835    | Isoform 2 of Calcium-dependent secretion activator 1 OS=Mus musculus GN=Cadps                                          |
| Q80T1     | Cadps    | 1.102122491             | 0.140284575      | 1.68706E-06     | 5.772870728   | Calcium-dependent secretion activator 1 OS=Mus musculus GN=Cadps PE=1 SV=3                                             |
| QC9C213   | Uqcrc1   | 1.107822005             | 0.147726159      | 0.000138756     | 3.857747165   | Cytochrome b-c1 complex subunit 1, mitochondrial OS=Mus musculus GN=Uqcrc1 PE=1 SV=2                                   |
| Q3UJH0    | Aak1     | 1.143897242             | 0.193957458      | 0.00019345      | 3.713431015   | AP2-associated protein kinase 1 OS=Mus musculus GN=Aak1 PE=1 SV=2                                                      |
| Q80T23-3  | Dnajc6   | 1.111121261             | 0.152016725      | 0.000327877     | 3.484288469   | Isoform 3 of Putative tyrosine-protein phosphatase auxilin OS=Mus musculus GN=Dnajc6                                   |
| O08599-2  | Stxbp1   | 1.217102593             | 0.283450782      | 0.000420865     | 3.375857328   | Isoform 2 of Syntaxin-binding protein 1 OS=Mus musculus GN=Stxbp1                                                      |
| O08599    | Stxbp1   | 1.219005238             | 0.285704325      | 0.000423548     | 3.373097056   | Syntaxin-binding protein 1 OS=Mus musculus GN=Stxbp1 PE=1 SV=2                                                         |
| Q90XL1    | Kif21b   | 0.794953482             | -0.331057655     | 0.000804419     | 3.094517752   | Kinesin-like protein KIF21B OS=Mus musculus GN=Kif21b PE=1 SV=2                                                        |
| P51863    | Atp6v0d1 | 1.133145705             | 0.180333381      | 0.000981817     | 3.007969632   | V-type proton ATPase subunit d 1 OS=Mus musculus GN=Atp6v0d1 PE=1 SV=2                                                 |
| Q7TQD2    | Tppp     | 1.386280979             | 0.4712197        | 0.001078219     | 2.967292898   | Tubulin polymerization-promoting protein OS=Mus musculus GN=Tppp PE=1 SV=1                                             |
| P17710-2  | Hk1      | 1.134429196             | 0.181966568      | 0.001156063     | 2.937018462   | Isoform HK1-SB of Hexokinase-1 OS=Mus musculus GN=Hk1                                                                  |
| P17710-4  | Hk1      | 1.131647569             | 0.178424727      | 0.001163715     | 2.93415355    | Isoform HK1-SC of Hexokinase-1 OS=Mus musculus GN=Hk1                                                                  |
| P05064    | Aldoa    | 1.244265351             | 0.315294187      | 0.001178822     | 2.928551588   | Fructose-bisphosphate aldolase A OS=Mus musculus GN=Aldoa PE=1 SV=2                                                    |
| P39053-5  | Dnm1     | 1.18332577              | 0.242847303      | 0.001275488     | 2.894323657   | Isoform 5 of Dynamin-1 OS=Mus musculus GN=Dnm1                                                                         |
| Q54774    | Ap3d1    | 1.085198687             | 0.117959208      | 0.001289174     | 2.88968858    | AP-3 complex subunit delta-1 OS=Mus musculus GN=Ap3d1 PE=1 SV=1                                                        |
| P39053-6  | Dnm1     | 1.183595288             | 0.243175588      | 0.001298721     | 2.88648397    | Isoform 6 of Dynamin-1 OS=Mus musculus GN=Dnm1                                                                         |
| Q68FD5    | Cltc     | 1.1005122               | 0.138175139      | 0.00135428      | 2.868291503   | Clathrin heavy chain 1 OS=Mus musculus GN=Cltc PE=1 SV=3                                                               |
| P39053-3  | Dnm1     | 1.186877732             | 0.247171321      | 0.001482087     | 2.829126225   | Isoform 3 of Dynamin-1 OS=Mus musculus GN=Dnm1                                                                         |
| P97427    | Crmp1    | 0.879110024             | -0.18588436      | 0.001486172     | 2.827930813   | Dihydropyrimidinase-related protein 1 OS=Mus musculus GN=Crmp1 PE=1 SV=1                                               |
| P56480    | Atp5b    | 1.1427315               | 0.192486463      | 0.001636866     | 2.785986871   | ATP synthase subunit beta, mitochondrial OS=Mus musculus GN=Atp5b PE=1 SV=2                                            |
| Q88PN8    | Dnm2     | 1.103153042             | 0.141632953      | 0.001775569     | 2.750662386   | DmX-like protein 2 OS=Mus musculus GN=Dnm2 PE=1 SV=3                                                                   |
| P63328-2  | Ppp3ca   | 1.111556433             | 0.152581195      | 0.002078636     | 2.682221453   | Isoform 2 of Serine/threonine-protein phosphatase 2B catalytic subunit alpha isoform OS=Mus musculus GN=Ppp3ca         |
| O88935    | Syn1     | 1.214356981             | 0.202294594      | 0.002294594     | 2.639294127   | Synapsin-1 OS=Mus musculus GN=Syn1 PE=1 SV=2                                                                           |
| O88935-3  | Syn1     | 1.214188755             | 0.279992717      | 0.00233142      | 2.632379559   | Isoform 3 of Synapsin-1 OS=Mus musculus GN=Syn1                                                                        |
| Q92YX7    | Pclo     | 1.098469206             | 0.135494426      | 0.002582077     | 2.58803079    | Protein piccolo OS=Mus musculus GN=Pclo PE=1 SV=4                                                                      |
| O61028-3  | Dlg4     | 1.142739018             | 0.192495954      | 0.002592452     | 2.586289243   | Isoform 3 of Disks large homolog 4 OS=Mus musculus GN=Dlg4                                                             |
| O9JMH9-4  | Myo18a   | 1.079470399             | 0.110323682      | 0.002614256     | 2.582651859   | Isoform 4 of Unconventional myosin-XVIIIA OS=Mus musculus GN=Myo18a                                                    |
| Q5V1M6    | Rap1gap2 | 1.186423622             | 0.246619228      | 0.002641797     | 2.578100497   | Rap1 GTPase-activating protein 2 OS=Mus musculus GN=Rap1gap2 PE=2 SV=1                                                 |
| P13595    | Ncam1    | 0.90259266              | -0.147853048     | 0.002696894     | 2.569136183   | Neural cell adhesion molecule 1 OS=Mus musculus GN=Ncam1 PE=1 SV=3                                                     |
| O9JMH9-5  | Myo18a   | 1.079756115             | 0.110705487      | 0.002716663     | 2.565964208   | Isoform 5 of Unconventional myosin-XVIIIA OS=Mus musculus GN=Myo18a                                                    |
| P63328    | Ppp3ca   | 1.119307533             | 0.162606476      | 0.002770923     | 2.557375561   | Serine/threonine-protein phosphatase 2B catalytic subunit alpha isoform OS=Mus musculus GN=Ppp3ca PE=1 SV=1            |
| P68404    | Prkcb    | 1.091441587             | 0.12623492       | 0.002804681     | 2.552116496   | Protein kinase C beta type OS=Mus musculus GN=Prkcb PE=1 SV=4                                                          |
| P13595-2  | Ncam1    | 0.901856195             | -0.149030688     | 0.002893867     | 2.538521464   | Isoform 2 of Neural cell adhesion molecule 1 OS=Mus musculus GN=Ncam1                                                  |
| Q88G39    | Sv2b     | 1.236907142             | 0.306737197      | 0.00289737      | 2.537996031   | Synaptic vesicle glycoprotein 2B OS=Mus musculus GN=Sv2b PE=1 SV=1                                                     |
| O9JLM8    | Dclk1    | 0.880149241             | -0.184179923     | 0.002934559     | 2.532457081   | Serine/threonine-protein kinase DCLK1 OS=Mus musculus GN=Dclk1 PE=1 SV=1                                               |
| P63040    | Cplx1    | 1.162790272             | 0.217590907      | 0.002960157     | 2.528685208   | Complexin-1 OS=Mus musculus GN=Cplx1 PE=1 SV=1                                                                         |
| O9QYX7-2  | Pclo     | 1.097854788             | 0.134687244      | 0.00297544      | 2.526448758   | Isoform 2 of Protein piccolo OS=Mus musculus GN=Pclo                                                                   |
| Q80U28    | Madd     | 1.121153709             | 0.164984084      | 0.00313307      | 2.504029876   | MAP kinase-activating death domain protein OS=Mus musculus GN=Madd PE=1 SV=2                                           |
| Q80U28-3  | Madd     | 1.119195116             | 0.162461572      | 0.003338674     | 2.476425996   | Isoform 3 of MAP kinase-activating death domain protein OS=Mus musculus GN=Madd                                        |
| Q88J11    | Slc6a17  | 1.118664044             | 0.282198283      | 0.003493374     | 2.475043974   | Sodium-dependent neutral amino acid transporter SLC6A17 OS=Mus musculus GN=Slc6a17 PE=1 SV=1                           |
| P13595-4  | Ncam1    | 0.894833019             | -0.160309602     | 0.003677503     | 2.434446953   | Isoform 4 of Neural cell adhesion molecule 1 OS=Mus musculus GN=Ncam1                                                  |
| P63141    | Kna2     | 1.331271119             | 0.412745892      | 0.003880279     | 2.411137017   | Potassium voltage-gated channel subfamily A member 2 OS=Mus musculus GN=Kna2 PE=1 SV=1                                 |
| Q5V1V6-2  | Rap1gap2 | 1.202100923             | 0.265558023      | 0.003898908     | 2.408956802   | Isoform 2 of Rap1 GTPase-activating protein 2 OS=Mus musculus GN=Rap1gap2                                              |
| P13595-3  | Ncam1    | 0.904049659             | -0.145526074     | 0.003963724     | 2.401896444   | Isoform 3 of Neural cell adhesion molecule 1 OS=Mus musculus GN=Ncam1                                                  |
| Q9JLM8-2  | Dclk1    | 0.889038658             | -0.169681943     | 0.00404068      | 2.393545564   | Isoform 2 of Serine/threonine-protein kinase DCLK1 OS=Mus musculus GN=Dclk1                                            |
| P62814    | Atp6v1b2 | 1.141866594             | 0.191394109      | 0.004044406     | 2.39134526    | V-type proton ATPase subunit B, brain isoform OS=Mus musculus GN=Atp6v1b2 PE=1 SV=1                                    |
| Q9DBG3    | Ap2b1    | 1.086593874             | 0.119812818      | 0.004154076     | 2.38125557    | AP-2 complex subunit beta OS=Mus musculus GN=Ap2b1 PE=1 SV=1                                                           |
| P05063    | Aldoc    | 1.193180124             | 0.254811851      | 0.004179965     | 2.378827369   | Fructose-bisphosphate aldolase C OS=Mus musculus GN=Aldoc PE=1 SV=4                                                    |
| P84086    | Cplx2    | 1.151256423             | 0.203209206      | 0.004297567     | 2.366777342   | Complexin-2 OS=Mus musculus GN=Cplx2 PE=1 SV=1                                                                         |
| P68404-2  | Prkcb    | 1.087685583             | 0.121261577      | 0.004409751     | 2.355585927   | Isoform Beta-II of Protein kinase C beta type OS=Mus musculus GN=Prkcb                                                 |
| Q81018    | Zfyve1   | 1.238260806             | 0.380315211      | 0.004427842     | 2.353807925   | Zinc finger FVE domain-containing protein 1 OS=Mus musculus GN=Zfyve1 PE=2 SV=2                                        |
| Q8C419    | Gpr158   | 1.121532322             | 0.165471199      | 0.004467542     | 2.349931311   | Probable G-protein coupled receptor 158 OS=Mus musculus GN=Gpr158 PE=1 SV=2                                            |
| O88935-1  | Syn1     | 1.199501975             | 0.262435533      | 0.004769642     | 2.329787401   | Isoform 1b of Synapsin-1 OS=Mus musculus GN=Syn1                                                                       |
| P63044    | Vamp2    | 1.130059788             | 0.176399103      | 0.00474547      | 2.323720727   | Vesicle-associated membrane protein 2 OS=Mus musculus GN=Vamp2 PE=1 SV=2                                               |
| Q03265    | Atp5a1   | 1.139520599             | 0.188427004      | 0.004977315     | 2.303004834   | ATP synthase subunit alpha, mitochondrial OS=Mus musculus GN=Atp5a1 PE=1 SV=1                                          |
| P46096    | Syt1     | 1.194394595             | 0.256279541      | 0.005004145     | 2.300670158   | Synaptotagmin-1 OS=Mus musculus GN=Syt1 PE=1 SV=1                                                                      |
| Q61548-3  | Snap91   | 1.089942142             | 0.124251554      | 0.005098733     | 2.29253772    | Isoform 3 of Clathrin coat assembly protein AP180 OS=Mus musculus GN=Snap91                                            |
| Q80U28-11 | Madd     | 1.137929113             | 0.18641071       | 0.005364719     | 2.270453043   | Isoform 11 of MAP kinase-activating death domain protein OS=Mus musculus GN=Madd                                       |
| Q88RT1-6  | Clasp2   | 0.846131163             | -0.241046775     | 0.005509035     | 2.258924506   | Isoform 3 of CLIP-associating protein 2 OS=Mus musculus GN=Clasp2                                                      |
| Q8VD37-3  | Sgip1    | 1.063845643             | 0.08928884       | 0.005756671     | 2.239828576   | Isoform 3 of SH3-containing GRB2-like protein 3-interacting protein 1 OS=Mus musculus GN=Sgip1                         |
| Q80U28-2  | Madd     | 1.118663333             | 0.161775916      | 0.005929036     | 2.227015923   | Isoform 2 of MAP kinase-activating death domain protein OS=Mus musculus GN=Madd                                        |
| Q60597-4  | Ogdh     | 1.056660808             | 0.07951234       | 0.005943343     | 2.225969219   | Isoform 4 of 2-oxoglutarate dehydrogenase, mitochondrial OS=Mus musculus GN=Ogdh                                       |
| Q60597    | Ogdh     | 1.056552004             | 0.079363779      | 0.006184034     | 2.208728124   | 2-oxoglutarate dehydrogenase, mitochondrial OS=Mus musculus GN=Ogdh PE=1 SV=3                                          |
| Q04447    | Ckb      | 1.195815418             | 0.257994717      | 0.006282514     | 2.201866519   | Creatine kinase B-type OS=Mus musculus GN=Ckb PE=1 SV=1                                                                |
| Q80U28-7  | Madd     | 1.139299321             | 0.188146827      | 0.006366154     | 2.196122885   | Isoform 7 of MAP kinase-activating death domain protein OS=Mus musculus GN=Madd                                        |
| P15209-2  | Ntrk2    | 1.233453957             | 0.302703863      | 0.006811491     | 2.166757792   | Isoform GP95-TRKB of BDNF/NT-3 growth factors receptor OS=Mus musculus GN=Ntrk2                                        |
| P14873    | Map1b    | 0.866261404             | -0.207125655     | 0.006966774     | 2.156968282   | Microtubule-associated protein 1B OS=Mus musculus GN=Map1b PE=1 SV=2                                                   |
| Q921G4    | Atp6v0a1 | 1.108007158             | 0.138561379      | 0.007333748     | 2.192307121   | V-type proton ATPase 116 kDa subunit a isoform 1 OS=Mus musculus GN=Atp6v0a1 PE=1 SV=3                                 |
| Q60575-3  | Kif1b    | 1.104296916             | 0.143128126      | 0.007691895     | 2.113966647   | Isoform 3 of Kinesin-like protein KIF1B OS=Mus musculus GN=Kif1b                                                       |
| Q80VP1    | Epn1     | 1.092474181             | 0.127599184      | 0.007750737     | 2.110656988   | Epsin-1 OS=Mus musculus GN=Epn1 PE=1 SV=3                                                                              |
| Q80U28-13 | Madd     | 1.135528334             | 0.183363705      | 0.007866375     | 2.104425512   | Isoform 13 of MAP kinase-activating death domain protein OS=Mus musculus GN=Madd                                       |
| P15209    | Ntrk2    | 1.25197476              | 0.324205478      | 0.008617028     | 2.064642489   | BDNF/NT-3 growth factors receptor OS=Mus musculus GN=Ntrk2 PE=1 SV=1                                                   |
| Q7TQF7    | Amph     | 1.06331557              | 0.088569822      | 0.008632614     | 2.063857675   | Amphiphysin OS=Mus musculus GN=Amph PE=1 SV=1                                                                          |
| A2C649-6  | Kalrn    | 0.858419909             | -0.220244558     | 0.008673958     | 2.061782682   | Isoform 6 of Kalirin OS=Mus musculus GN=Kalrn                                                                          |
| P68181-3  | Prkacb   | 0.848191088             | -0.237538771     | 0.009010467     | 2.045252685   | Isoform 3 of cAMP-dependent protein kinase catalytic subunit beta OS=Mus musculus GN=Prkacb                            |
| Q8R317    | Ubqln1   | 1.296878713             | 0.375043562      | 0.009340158     | 2.029645758   | Ubiquilin-1 OS=Mus musculus GN=Ubqln1 PE=1 SV=1                                                                        |
| P15105    | Glul     | 1.135529821             | 0.183365594      | 0.009356754     | 2.028874779   | Glutamine synthetase OS=Mus musculus GN=Glul PE=1 SV=6                                                                 |
| A2AJA9    | Gm996    | 1.330757176             | 0.412274346      | 0.009446523     | 2.024727991   | Uncharacterized protein C9orf172 homolog OS=Mus musculus GN=Gm996 PE=1 SV=1                                            |
| Q4KMM3    | Oxr1     | 1.143141039             | 0.193003412      | 0.009522726     | 2.021238719   | Oxidation resistance protein 1 OS=Mus musculus GN=Oxr1 PE=2 SV=3                                                       |
| P15209-4  | Ntrk2    | 1.263562541             | 0.337497073      | 0.010551817     | 1.97667273    | Isoform L10 of BDNF/NT-3 growth factors receptor OS=Mus musculus GN=Ntrk2                                              |
| Q61207    | Psap     | 0.878309824             | -0.187198155     | 0.010996749     | 1.958735698   | Sulfated glycoprotein 1 OS=Mus musculus GN=Psap PE=1 SV=2                                                              |
| Q76M23    | Ppp2r1a  | 0.966307293             | -0.049446045     | 0.011937898     | 1.923071211   | Serine/threonine-protein phosphatase 2A 65 kDa regulatory subunit A alpha isoform OS=Mus musculus GN=Ppp2r1a PE=1 SV=3 |
| Q35643    | Ap1b1    | 1.087439457             | 0.120935082      | 0.012407662     | 1.90631006    | AP-1 complex subunit beta-1 OS=Mus musculus GN=Ap1b1 PE=2 SV=2                                                         |
| O88343    | Slc4a4   | 1.118072663             | 0.161013951      | 0.01254611      | 1.901490893   | Electrogenic sodium bicarbonate cotransporter 1 OS=Mus musculus GN=Slc4a4 PE=1 SV=2                                    |
| P60879    | Snap25   | 1.148865519             | 0.200209933      | 0.012888674     | 1.889791629   | Synaptosomal-associated protein 25 OS=Mus musculus GN=Snap25 PE=1 SV=1                                                 |
| Q99K10    | Aco2     | 1.105768973             | 0.145049997      | 0.014873664     | 1.827582728   | Aconitase hydratase, mitochondrial OS=Mus musculus GN=Aco2 PE=1 SV=1                                                   |
| Q8CC35-3  | Synpo    | 1.11809146              | 0.161038206      | 0.015977309     | 1.796496364   | Isoform 3 of Synaptopodin OS=Mus musculus GN=Synpo                                                                     |
| P0DI97    | Nrxn1    | 0.869982503             | -0.200941709     | 0.016136861     | 1.792180939   | Neurexin-1-beta OS=Mus musculus GN=Nrxn1 PE=1 SV=1                                                                     |
| P47708    | Rph3a    | 1.110048753             | 0.150623041      | 0.016644398     | 1.778731904   | Rabphilin-3A OS=Mus musculus GN=Rph3a PE=1 SV=2                                                                        |
| Q8C8R3    | Ank2     | 1.050832737             | 0.071533052      | 0.016696027     | 1.777386855   | Ankyrin-2 OS=Mus musculus GN=Ank2 PE=1 SV=2                                                                            |
| O35465    | Fkbp8    | 0.884736556             | -0.176680167     | 0.016807371     | 1.744500218   | Peptidyl-prolyl cis-trans isomerase FKBP8 OS=Mus musculus GN=Fkbp8 PE=1 SV=2                                           |
| Q68ED7    | Crtc1    | 1.281822223             | 0.358196187      | 0.016842506     | 1.775959297   | CREB-regulated transcription coactivator 1 OS=Mus musculus GN=Crtc1 PE=2 SV=1                                          |
| Q80UP3    | Dgkz     | 1.224531957             | 0.292230424      | 0.017395571     | 1.739563117   | Glycylglycerol kinase zeta OS=Mus musculus GN=Dgkz PE=1 SV=2                                                           |
| P33173    | Kif1a    | 1.080814931             | 0.112119509      | 0.017830141     | 1.74884523    | Kinesin-like protein KIF1A OS=Mus musculus GN=Kif1a PE=1 SV=2                                                          |
| Q9D415-3  | Dlgap1   | 1.181522789             | 0.240647456      | 0.018341899     | 1.736555692   | Isoform 3 of Disks large-associated protein 1 OS=Mus musculus GN=Dlgap1                                                |
| O9WVC2-2  | Lynx1    | 1.072392699             | 0.102177981      | 0.018589177     | 1.730739983   | Isoform 2 of Ly-6/neurotoxin-like protein 1 OS=Mus musculus GN=Lynx1                                                   |
| Q6ZPE2    | Sbf1     | 1.090947849             | 0.125582138      | 0.018883478     | 1.72391181    | Myotubularin-related protein 5 OS=Mus musculus GN=Sbf1 PE=1 SV=2                                                       |
| Q6N560    | Fbxo41   | 1.195353333             | 0.257439539      |                 |               |                                                                                                                        |

## Bumetanide Group FMRP targets

| Accession | Gene     | Fold Change (KO vs. WT) | Log2 Fold Change | Students T Test | -Log10 T Test | Description                                                                                       |
|-----------|----------|-------------------------|------------------|-----------------|---------------|---------------------------------------------------------------------------------------------------|
| O4KMM3-4  | Oxr1     | 1.132425323             | 0.179415916      | 0.020919692     | 1.679444712   | Isoform 4 of Oxidation resistance protein 1 OS=Mus musculus GN=Oxr1                               |
| P17426-2  | Ap2a1    | 1.067354255             | 0.094039087      | 0.022107149     | 1.655467257   | Isoform B of AP-2 complex subunit alpha-1 OS=Mus musculus GN=Ap2a1                                |
| Q8C8R3-2  | Ank2     | 1.047556493             | 0.067028048      | 0.022391226     | 1.64992213    | Isoform 2 of Ankyrin-2 OS=Mus musculus GN=Ank2                                                    |
| P17426    | Ap2a1    | 1.067336158             | 0.094014625      | 0.02244902      | 1.648802619   | AP-2 complex subunit alpha-1 OS=Mus musculus GN=Ap2a1 PE=1 SV=1                                   |
| P46460    | Nsf      | 1.077785053             | 0.108069484      | 0.02322648      | 1.634016602   | Vesicle-fusing ATPase OS=Mus musculus GN=Nsf PE=1 SV=2                                            |
| P27546-3  | Map4     | 0.95278781              | -0.06977314      | 0.023468276     | 1.629518806   | Isoform 3 of Microtubule-associated protein 4 OS=Mus musculus GN=Map4                             |
| P27546    | Map4     | 0.95263787              | -0.070000193     | 0.02354702      | 1.628064041   | Microtubule-associated protein 4 OS=Mus musculus GN=Map4 PE=1 SV=3                                |
| A2ALS5-4  | Rap1gap  | 1.156184329             | 0.209371423      | 0.023955014     | 1.620603565   | Isoform 4 of Rap1 GTPase-activating protein 1 OS=Mus musculus GN=Rap1gap                          |
| O88343-2  | Slc4a4   | 1.106724685             | 0.146296374      | 0.024219994     | 1.615825974   | Isoform 2 of Electrogenic sodium bicarbonate cotransporter 1 OS=Mus musculus GN=Slc4a4            |
| D3YZU1    | Shank1   | 1.227214349             | 0.295387257      | 0.02514443      | 1.59955821    | SH3 and multiple ankyrin repeat domains protein 1 OS=Mus musculus GN=Shank1 PE=1 SV=1             |
| Q8C078    | Camkk2   | 1.117570138             | 0.160365377      | 0.025283925     | 1.597155512   | Calcium/calmodulin-dependent protein kinase kinase 2 OS=Mus musculus GN=Camkk2 PE=1 SV=2          |
| P35438    | Griin1   | 1.265173173             | 0.33933487       | 0.026241856     | 1.581005459   | Glutamate receptor ionotropic, NMDA 1 OS=Mus musculus GN=Griin1 PE=1 SV=1                         |
| Q9R0N7    | Syt7     | 1.132519527             | 0.179535925      | 0.027281559     | 1.564130815   | Synaptotagmin-7 OS=Mus musculus GN=Syt7 PE=1 SV=1                                                 |
| Q3TXX4    | Slc17a7  | 1.372261387             | 0.456555311      | 0.027787025     | 1.556157947   | Vesicular glutamate transporter 1 OS=Mus musculus GN=Slc17a7 PE=1 SV=2                            |
| Q9Z206    | Sept5    | 1.21513648              | 0.281118361      | 0.028110339     | 1.55113392    | Septin-5 OS=Mus musculus GN=Sept5 PE=1 SV=2                                                       |
| Q8CHC4    | Synj1    | 1.072339813             | 0.100762153      | 0.02850387      | 1.545096176   | Synaptojanin-1 OS=Mus musculus GN=Synj1 PE=1 SV=3                                                 |
| P70663    | Sparcl1  | 0.845560886             | -0.242019452     | 0.028519066     | 1.544864709   | SPARC-like protein 1 OS=Mus musculus GN=Sparcl1 PE=2 SV=3                                         |
| Q8BNV6    | Ncs1     | 1.298518601             | 0.376866681      | 0.029998147     | 1.522905572   | Neuronal calcium sensor 1 OS=Mus musculus GN=Ncs1 PE=2 SV=3                                       |
| A2ALS5-3  | Rap1gap  | 1.145151206             | 0.195538105      | 0.03046749      | 1.51616333    | Isoform 3 of Rap1 GTPase-activating protein 1 OS=Mus musculus GN=Rap1gap                          |
| Q62448    | Eif4g2   | 0.914507233             | -0.128933515     | 0.03332771      | 1.477194526   | Eukaryotic translation initiation factor 4 gamma 2 OS=Mus musculus GN=Eif4g2 PE=1 SV=2            |
| Q3V0G7    | Garnl3   | 1.165232317             | 0.220617619      | 0.03390304      | 1.469761359   | GTPase-activating Rap/Ran-GAP domain-like protein 3 OS=Mus musculus GN=Garnl3 PE=1 SV=1           |
| P11881-3  | Itrp1    | 1.132747766             | 0.179826646      | 0.034211797     | 1.465824116   | Isoform 3 of Inositol 1,4,5-trisphosphate receptor type 1 OS=Mus musculus GN=Itrp1                |
| P60879-2  | Snap25   | 1.139107163             | 0.187903476      | 0.035411256     | 1.450858673   | Isoform 2 of Synaptosomal-associated protein 25 OS=Mus musculus GN=Snap25                         |
| P63085    | Mapk1    | 0.958179975             | -0.061631432     | 0.03792962      | 1.421021509   | Mitogen-activated protein kinase 1 OS=Mus musculus GN=Mapk1 PE=1 SV=3                             |
| P46935    | Nedd4    | 1.27863083              | 0.354599785      | 0.038281867     | 1.417006893   | E3 ubiquitin-protein ligase NEDD4 OS=Mus musculus GN=Nedd4 PE=1 SV=3                              |
| A2AJU0    | Map7d1   | 1.07698301              | 0.106995491      | 0.03889782      | 1.41007474    | MAP7 domain-containing protein 1 OS=Mus musculus GN=Map7d1 PE=1 SV=1                              |
| Q6PIC6    | Atp1a3   | 1.074760467             | 0.104015161      | 0.03899844      | 1.408952761   | Sodium/potassium-transporting ATPase subunit alpha-3 OS=Mus musculus GN=Atp1a3 PE=1 SV=1          |
| Q80TM9-4  | Nisch    | 1.157878176             | 0.211483471      | 0.039363109     | 1.404910606   | Isoform 4 of Nischarin OS=Mus musculus GN=Nisch                                                   |
| Q9CS84-4  | Nrxn1    | 0.897317456             | -0.156309617     | 0.039437943     | 1.404085742   | Isoform 4a of Neurexin-1 OS=Mus musculus GN=Nrxn1                                                 |
| Q6GQ51    | Slc25a23 | 1.121279532             | 0.165145984      | 0.039510176     | 1.403291039   | Calcium-binding mitochondrial carrier protein SCAmC-3 OS=Mus musculus GN=Slc25a23 PE=2 SV=1       |
| O88444    | Adcy1    | 0.534711388             | -0.903167691     | 0.039573524     | 1.402595276   | Adenylate cyclase type 1 OS=Mus musculus GN=Adcy1 PE=2 SV=2                                       |
| Q02053    | Uba1     | 0.938054048             | -0.092257046     | 0.039797857     | 1.400140312   | Ubiquitin-like modifier-activating enzyme 1 OS=Mus musculus GN=Uba1 PE=1 SV=1                     |
| Q8BRT1    | Clasp2   | 0.935477211             | -0.092255886     | 0.040873144     | 1.388561956   | ClIP-associating protein 2 OS=Mus musculus GN=Clasp2 PE=1 SV=1                                    |
| Q9QXL2-3  | Kif21a   | 0.93757555              | -0.092993147     | 0.04106271      | 1.386552396   | Isoform 3 of Kinesin-like protein KIF21A OS=Mus musculus GN=Kif21a                                |
| Q9QXL2    | Kif21a   | 0.93757555              | -0.092993147     | 0.04106271      | 1.386552396   | Kinesin-like protein KIF21A OS=Mus musculus GN=Kif21a PE=1 SV=2                                   |
| Q35954    | Pitpnm1  | 0.755153086             | -0.405158955     | 0.04137169      | 1.38329674    | Membrane-associated phosphatidylinositol transfer protein 1 OS=Mus musculus GN=Fitpnm1 PE=1 SV=1  |
| Q9QW16    | Srcin1   | 1.092081754             | 0.127080861      | 0.041436647     | 1.38261539    | SRC kinase signaling inhibitor 1 OS=Mus musculus GN=Srcin1 PE=1 SV=2                              |
| Q8VDN2    | Atp1a1   | 1.104030589             | 0.142780145      | 0.0415292       | 1.381646438   | Sodium/potassium-transporting ATPase subunit alpha-1 OS=Mus musculus GN=Atp1a1 PE=1 SV=1          |
| Q9QYR6    | Map1a    | 1.045503346             | 0.064197679      | 0.045703505     | 1.340050493   | Microtubule-associated protein 1A OS=Mus musculus GN=Map1a PE=1 SV=2                              |
| Q9QW16-2  | Srcin1   | 1.088880013             | 0.122844988      | 0.045807856     | 1.339060038   | Isoform 2 of SRC kinase signaling inhibitor 1 OS=Mus musculus GN=Srcin1                           |
| Q5SQX6    | Cyflp2   | 1.063351557             | 0.088618648      | 0.046095685     | 1.336339729   | Cytoplasmic FMR1-interacting protein 2 OS=Mus musculus GN=Cyflp2 PE=1 SV=2                        |
| Q9CS84-3  | Nrxn1    | 0.897912186             | -0.155353735     | 0.046338175     | 1.334061076   | Isoform 3a of Neurexin-1 OS=Mus musculus GN=Nrxn1                                                 |
| Q8OU23-3  | Snph     | 1.093679084             | 0.129189473      | 0.04892683      | 1.310452925   | Isoform 3 of Syntrophin OS=Mus musculus GN=Snph                                                   |
| B2RUJ5-3  | Apba1    | 1.086387976             | 0.119539417      | 0.049197246     | 1.308059206   | Isoform 3 of Amyloid beta A4 precursor protein-binding family A member 1 OS=Mus musculus GN=Apba1 |
| Q6PIE5    | Atp1a2   | 1.085559949             | 0.118439399      | 0.049273842     | 1.307383572   | Sodium/potassium-transporting ATPase subunit alpha-2 OS=Mus musculus GN=Atp1a2 PE=1 SV=1          |
